1 RUNNING TITLE: “Binge Alcohol and *Burkholderia* Mouse Model”

2

3

4

5 A Mouse Model Of Binge Alcohol Consumption and *Burkholderia* Infection

6

7

8 Victor Jimenez Jr<sup>1,2</sup>, Ryan Moreno<sup>1</sup>, Erik Settles<sup>1,2</sup>, Bart J Currie<sup>3</sup>, Paul Keim<sup>1,2</sup>,  
9 Fernando P. Monroy<sup>1,2,\*</sup>

10 <sup>1</sup> Department of Biological Sciences, <sup>2</sup> Pathogen & Microbiome Institute (PMI), Northern  
11 Arizona University, P.O. Box 5640, Flagstaff, AZ 86011. USA

12 <sup>3</sup> Menzies School of Health Research, Charles Darwin University, Darwin, Australia

13

14

15 \* Corresponding Author: Email: [Fernando.monroy@nau.edu](mailto:Fernando.monroy@nau.edu) (FM)

16

17

18

19 *Keywords:* Alcohol; *Burkholderia*; C57BL/6; Binge drinking; TEER; EpH4 cells; bEnd.3 cells,

20 melioidosis, GM-CSF.

21

22

23

24

25

26 **Abstract:**

27

28 **Background**

29 Binge drinking, a common form of alcohol consumption, is associated with increased mortality  
30 and morbidity; yet, its effects on the immune system's ability to defend against infectious agents  
31 are poorly understood. *Burkholderia pseudomallei*, the causative agent of melioidosis can occur  
32 in healthy humans, yet binge alcohol use is progressively being recognized as a major risk factor.  
33 Although our previous studies demonstrated that binge alcohol exposure results in reduced  
34 alveolar macrophage function and increased *Burkholderia* virulence *in vitro*, no experimental  
35 studies have investigated the outcomes of binge alcohol on *Burkholderia* spp. infection *in vivo*.

36 **Principal Findings**

37 We used the close genetic relatives of *B. pseudomallei*, *B. thailandensis* E264 and *B.*  
38 *vietnamiensis*, as useful BSL-2 model systems. Eight-week-old female C57BL/6 mice were  
39 administered alcohol comparable to human binge drinking episodes (4.4 g/kg) or PBS  
40 intraperitoneally 30 min before a non-lethal intranasal infection. In an initial *B. thailandensis*  
41 infection ( $3 \times 10^5$ ), bacteria accumulated in the lungs and disseminated to the spleen in alcohol  
42 administered mice only, compared with PBS treated mice at 24 h post-infection (PI). The  
43 greatest bacterial load occurred with *B. vietnamiensis* ( $1 \times 10^6$ ) in lungs, spleen, and brain tissue  
44 by 72 h PI. Pulmonary cytokine expression (TNF- $\alpha$ , GM-CSF) decreased, while splenic cytokine  
45 (IL-10) increased in binge drunk mice. Increased lung and brain permeability was observed as  
46 early as 2 h post alcohol administration *in vivo*. Trans-epithelial electrical resistance (TEER) was  
47 significantly decreased, while intracellular invasion of non-phagocytic cells increased with 0.2%  
48 v/v alcohol exposure *in vitro*.

49 **Conclusions**

50 Our results indicate that a single binge alcohol dose suppressed innate immune functions and  
51 increased the ability of less virulent *Burkholderia* strains to disseminate through increased barrier  
52 permeability and intracellular invasion of non-phagocytic cells.

### 53 **Author Summary**

54 *Burkholderia pseudomallei* causes the disease melioidosis, which occurs in most tropical regions  
55 across the globe. Exposure rarely evolves to significant disease in the absence of specific  
56 comorbidities, such as binge alcohol intoxication. In susceptible hosts, the disease is primarily  
57 manifested as pneumonic melioidosis and can be rapidly fatal if untreated. In this study, we  
58 utilized *B. thailandensis*, a genetically similar strain to *B. pseudomallei*, and opportunistic *B.*  
59 *vietnamiensis*, a known human pathogen that utilizes similar virulence strategies as *B.*  
60 *pseudomallei* in immunocompromised and cystic fibrosis patients. The study investigates the  
61 impact of a single binge alcohol episode on infectivity and immune response *in vivo*. We show  
62 that a single binge alcohol episode prior to inhaling *Burkholderia* species increases bacterial  
63 spread to the lungs and brain. We also identify alcohol-induced tissue permeability and epithelial  
64 cell invasion as modes of action for greater bacterial spread and survival inside the host. Our  
65 results support the public health responses being developed in melioidosis-endemic regions that  
66 emphasize the nature of binge drinking as a prime concern, especially around potential times of  
67 exposure to environmental *B. pseudomallei*.

### 68 **Introduction**

69 Binge drinking, and respiratory infections are both significant global health burdens [43].  
70 Patients with alcohol use disorders (AUDs) are more frequently infected with pneumonic  
71 pathogens and experience increased morbidity and mortality from these infections [2, 9]. The  
72 emerging tropical disease melioidosis is most frequently characterized by pulmonary infection,

73 with pneumonia being the presentation in over half of all cases and a reported mortality rate of  
74 up to 53% globally [14]. *Burkholderia pseudomallei* is the causative agent of melioidosis and is a  
75 Tier 1 select agent, having been identified as a potential bio-terrorist weapon [50]. The presence  
76 of one or more risk factors have been observed in 80% of confirmed melioidosis cases, with  
77 nearly 40% of Australian cases having hazardous alcohol use as a risk factor [15]. Similarly,  
78 *Streptococcus pneumoniae* is the most common bacterial etiology of community-acquired  
79 pneumonia globally and the incidence of pneumococcal infections in individuals with a history  
80 of alcohol abuse is higher than the general population [7].

81         Additionally, hazardous alcohol consumption has been shown to alter the initial host-  
82 pathogen interactions during infections caused by *Mycobacterium avium*, *Escherichia coli*,  
83 *Streptococcus pneumoniae*, *Klebsiella pneumoniae*, and *Staphylococcus aureus*. [5, 11, 20]. The  
84 amount and the pattern of alcohol consumption affect the immune system in an exposure-  
85 dependent manner [19]. Most studies indicate acute alcohol consumption is associated with  
86 attenuation of the innate inflammatory response expected during infection [41]; whereas, chronic  
87 alcoholism produces a predominantly proinflammatory effect that is most often associated with  
88 alcohol induced-liver injury [53]. Studies in both human and animal models describe that binge  
89 alcohol consumption is characterized by the consumption of 4-6 alcoholic drinks or reaching a  
90 minimum blood alcohol concentration (BAC) of 0.08% within a 2 – 3-hour drinking episode  
91 [33]. It is unclear specifically how a single binge alcohol intoxication episode alters the lung  
92 environment leading to pneumonic infections such as with melioidosis.

93         In our previous studies, we found binge alcohol conditions alter alveolar macrophage  
94 phagocytosis, reactive nitric oxide (RNS) production, and increased intracellular survival of  
95 *Burkholderia thailandensis in vitro* [26]. From these findings we concluded that a single

96 exposure of binge alcohol intoxication increased the infectivity of less pathogenic *B.*  
97 *thailandensis* E264 by suppressing the initial host immune response and facilitating a favorable  
98 niche for possible bacterial dissemination and survival. However, the *in vivo* effects of binge  
99 alcohol consumption on innate immunity during a *Burkholderia* species infection have not been  
100 determined. In this study we designed a binge alcohol intoxication mouse model to investigate  
101 the effects of a single dose of alcohol on the interaction between less pathogenic *B.*  
102 *thailandensis*, a genetically similar strain to *B. pseudomallei*, and the initial innate immune  
103 response to infection. In addition, we utilized opportunistic *B. vietnamiensis* to study the impact  
104 of binge alcohol on the infectivity and immune response to a known human pathogen that  
105 utilizes similar virulence strategies as *B. pseudomallei* in cystic fibrosis patients [31, 51]. Our  
106 results indicate that a single binge alcohol episode can increase *Burkholderia* species infectivity  
107 and tissue colonization, while increasing tissue permeability and intracellular invasion of non-  
108 phagocytic cells.

## 109 **Materials and Methods**

110

### 111 *Ethics statement*

112 All use of vertebrate animals at Northern Arizona University was conducted under the American  
113 Association for Accreditation of Laboratory Animal Care (AAALAC) regulations and  
114 guidelines. Animal care and use were approved in accordance with the Institutional Animal Care  
115 and Use Committee (IACUC) according to the policies and procedure of Northern Arizona  
116 University (NAU), protocol 16-006. This approval is in accordance with Animal Welfare  
117 Assurance A3908-01 from the U.S Department of Health and Human Services.

### 118 *Bacterial growth and culture conditions*

119 For each study, frozen stock cultures (*B. thailandensis* E264 or *B. vietnamiensis* Florida, USA  
120 strain) were inoculated into Luria Bertani broth (LB) and incubated overnight at 37°C in an

121 orbital shaker incubator (200 rpm) (New Brunswick C25, Edison, NJ, USA). Bacteria were  
122 diluted 1:10 and grown to late-logarithmic phase measured by optical density at OD<sub>600</sub>  
123 absorbance in a spectrophotometer (Eppendorf Bio Photometer AG2233, Hamburg, Germany).  
124 Bacteria were collected in 1mL by centrifugation and resuspended in 1mL with pre-warmed  
125 Dulbecco's Phosphate-Buffered Saline (PBS) at a concentration of 1 X 10<sup>5</sup> or 10<sup>6</sup> cfu/25µL.  
126 Actual numbers of viable bacteria were determined by standard plate counts of the bacterial  
127 suspensions on LB agar plates. The Pathogen & Microbiome Institute (PMI), Northern Arizona  
128 University, USA, kindly provided *B. vietnamiensis*. All assays were run in triplicate and at least  
129 two independent experiments were performed with similar results.

### 130 *Animals*

131 Female 8-10 week old C57Bl/6 mice (Jackson Laboratory) with a body weight of 17-21 g were  
132 maintained on a standard laboratory chow ad libitum and were housed in a controlled  
133 environment with a 12-h light/dark cycle. After receipt, the mice were allowed to acclimate and  
134 recover from shipping stress for 5 days in our university laboratory animal facility. These mice  
135 were negative for common mouse pathogens during the period of this study.

### 136 *Binge alcohol animal model*

137 Binge alcohol intoxication was induced by intraperitoneal (IP) injection of 20% alcohol (4.4  
138 g/kg) in sterile tissue-culture grade water (Sigma Chemical Co., St. Louis, MO) maintained at  
139 room temperature. Each mouse was administered a single dose of alcohol that produced a peak  
140 BAC of ~256 mg/dL (0.256%). Mice had not been primed previously with alcohol consumption.  
141 Control mice received an equal volume of PBS IP. This BAC represents the higher end of the  
142 range observed in humans, but it is not particularly rare and has been reported as a common  
143 range in human binge drinkers in a number of studies [8]. Notably, mice eliminate alcohol from  
144 their systems more rapidly than humans, so producing biologically equivalent effects of alcohol

145 in mice, in order to mimic human binge drinkers, requires a higher dosage in mice. Briefly,  
146 viable *B. thailandensis* ( $10^5$  CFU) or *B. vietnamiensis* ( $10^6$  CFU) were administered in 25  $\mu$ l  
147 intranasally 30 min after IP injection of alcohol or PBS. Inoculums were administered into each  
148 nostril under isoflurane anesthesia. Mice were monitored to observe differences in exploratory  
149 and motor control characteristics, in addition to physical health. Mice were subsequently  
150 euthanized at 24 and 72 h after the intranasal injection. At these time points, depending on the  
151 experimental protocol, aortic blood was taken for cell counts or lung, spleen, and brain tissues  
152 were removed and processed for bacterial counts or cytokine measurements. Mice were divided  
153 into four groups, and no bacteria was cultured from non-infected mice. At least two independent  
154 animal experiments were run with similar results.

#### 155 *Animal binge alcohol profile and bacteriology of blood and tissues*

156 Blood alcohol concentrations were determined as described in above. Briefly, to determine binge  
157 alcohol profile non-infected mice received PBS or alcohol administered as a single dose of 4.4  
158 g/kg of a 20 % (weight/volume) alcohol solution in sterile water by IP injection during the light  
159 cycle. Alcohol was injected in mice by using a 27-gauge X 0.5-mm (0.4mm X 13mm) needle.  
160 All animals were deprived of food and water for 1 h before administration of alcohol but retained  
161 free access to food and water post alcohol administration. Blood samples were collected via the  
162 tail vein at 30, 60, 360, and 480 min after alcohol administration. Samples were collected in 20  
163  $\mu$ L heparinized capillary tubes and transferred to 1.5-mL vials that were septum-sealed and  
164 stored at 4° C until analyzed.  
165 Blood alcohol concentration measurements were made on blood serum as described in the R-Bio  
166 pharm UV-spectrophotometer method protocol (Cat. No. 176 290 035). Analysis was conducted  
167 with a UV-Visible Spectrophotometer (Varian Cary 50, Melbourne, Australia).

168 To quantify bacteria in the blood, blood samples were collected via the tail vein at 2 h PI and  
169 were plated directly onto LB agar plates. Plates were incubated overnight at 37° C for  
170 quantitative analysis of CFU at 24 and 48 h. Lung, spleen, and brain tissues were aseptically  
171 removed at 24 and 72 h PI for quantitative bacterial measurements. Each tissue was weighed in  
172 sterile LB and then homogenized with a ceramic bead mix as described by Precellys Lysing Kits  
173 manufacturer (Bertin Technologies, Montigny-Le-Bretonneau, France). Samples were then  
174 diluted and plated onto LB agar plates. Plates were incubated for 24 and 48 h at 37°C, and CFU  
175 counted. Alcohol profile and bacteria assays were run in at least triplicate and at least two  
176 independent experiments were performed with similar results.

177 *GM-CSF, TNF- $\alpha$ , and IL-10 tissue cytokine measurements*

178 Lung and spleen tissue homogenates collected at 24 and 72 h PI were utilized to quantify GM-  
179 CSF, TNF- $\alpha$ , and IL-10. Samples were measured using ELISA Ready-SET-Go kits (Affymetrix-  
180 eBioscience, San Diego, USA) with procedures supplied by the manufacturer. The minimum  
181 detectable levels of GM-CSF, TNF- $\alpha$ , and IL-10 were 4, 8, and <13 pg/mL, respectively. In  
182 brief, culture plates were coated with goat anti-mouse GM-CSF, TNF- $\alpha$ , or IL-10 capture  
183 antibody and were incubated overnight at 4° C. After the plates were washed, wells were blocked  
184 and incubated for 1 h at room temperature. After several washes, respective standards and  
185 samples were added to each well, and were incubated overnight at 4° C for maximal sensitivity.  
186 After several more washes biotinylated anti-mouse detection antibody was added to each well,  
187 and the plate was incubated at room temperature for 1 h. Streptavidin-horseradish peroxidase  
188 then was added, and the plate was incubated for 30 min at room temperature. After a final wash,  
189 peroxidase substrate TMB solution was added and incubated at room temperature in the dark for  
190 15 min. Adding 3 M sulfuric acid to each well stopped the reaction. Color development in each  
191 well was determined spectrophotometrically at 450 nm (Synergy HT, BioTek, Winooski, USA).



192 GM-CSF, TNF- $\alpha$ , or IL-10 results are expressed as pg/mL. Cytokine assays were run in six assay  
193 replicates and repeated independently at least twice with similar results.

194 *Assessment of lung and blood brain barrier (BBB) permeability*

195 To determine the effect of binge alcohol on lung and BBB permeability, mice were administered  
196 alcohol as described above. Evans blue dye (Sigma, St. Louis, USA) was administered 30 min  
197 post alcohol dose as described by Settles *et al.* (2013). After 1 h, the mice were sacrificed and  
198 perfused with 0.9% NaCl saline, and tissues were removed and weighed. Evans blue was  
199 extracted by immersing the tissues in a set volume of formamide and extracted Evans blue dye  
200 was quantified by measuring the dye absorbance in formamide at 610 nm. Evans blue dye assays  
201 were replicated in at least two independent experiments with similar results.

202 *Measuring transepithelial electrical resistance (TEER) and sodium fluorescein flux in lung*  
203  
204 *epithelial and brain endothelial monolayers*  
205

206 TEER was measured to quantify the effect of a single binge alcohol episode on lung epithelium  
207 (Eph4 1424.2, ATCC # CRL-3210) and brain endothelium (bEnd.3, ATCC # CRL-2299). Cell  
208 monolayers were grown to confluency on 0.4 micron ThinCert Transwells (Greiner Bio-One,  
209 Germany) with DMEM F12 medium (Gibco, Life Technologies) supplemented with 10% fetal  
210 bovine serum, 2 mM L-glutamine, 10 mM HEPES, 0.1 mM non-essential amino acids, 1.5 g/l  
211 sodium bicarbonate, 50 U/ml penicillin, and 50 mg/ml streptomycin. Cells were incubated at 37°  
212 C and 5.5% CO<sub>2</sub> prior to and after confluency. To characterize the formation of a tight  
213 monolayer, TEER measurements were obtained by measuring the overall resistance to the  
214 current between electrodes of the insert in a 24-well cell culture plate. The resistance value of a  
215 blank culture inserts (reflecting the material, commercial source, and pore size/density used in  
216 the experimental case) was subtracted from the total resistance measured, and the resulting value  
217 was multiplied by the membrane area to obtain the TEER measurement in  $\Omega$  cm<sup>2</sup>.

218 Cell monolayers were incubated in DMEM F12 media supplemented with 0% or 0.2%  
219 (v/v) alcohol for 1 and 8 h. Low evaporative cell culture plates and a compensating system were  
220 employed as described by Eysseric *et. al.* (1996) [17]. In addition, alcohol- and control non-  
221 supplemented media changes were used to ensure consistent alcohol concentrations. Alcohol  
222 concentration was selected based on  $\geq 90\%$  cell viability utilizing the Trypan blue exclusion cell  
223 viability test. Alcohol concentration was also consistent with average mouse BAC. TEER was  
224 measured as described previously using a Millicell-ERS Electrical Resistance System (Millipore,  
225 Bedford, USA).

226 To measure monolayer leakiness, cells monolayers grown and treated with DMEM F12  
227 media supplemented with 0% or 0.2% alcohol were rinsed and 0.1 mL of a 10 kDa sodium  
228 fluorescein labeled dextran (FITC Dextran) was added to the apical portion of the inserts and 0.6  
229 mL transport buffer (DMEM F12) was added to the basal lateral portion. At 2 h post alcohol  
230 administration, 100 $\mu$ L were collected from the basal lateral portion and transferred to a 96 well  
231 plate. The 96 well plates were analyzed for fluorescein fluorescence with the Synergy HT micro  
232 plate reader. The permeability coefficient of the cells was calculated by subtracting the inverse of  
233 the blank coefficient from the inverse of the total permeability coefficient. TEER and FITC-  
234 Dextran assays were conducted independently with six assay-replicates and replicated  
235 independently twice.

236 *Binge alcohol and non-phagocytic cells: live Burkholderia intracellular invasion assays*  
237 *B. thailandensis* and *B. vietnamiensis* cell invasions with and without alcohol exposure was  
238 measured using brain and lung epithelial cells. Briefly, cells were grown as previously described  
239 in 24 well cell culture plates. Confluent monolayers were grown in 0% or 0.2% v/v alcohol  
240 supplemented DMEM F12 media. *B. thailandensis* or *B. vietnamiensis* were grown overnight in  
241 sterile LB media. Prior to co-culturing conditions, the bacteria were diluted to late logarithmic

242 growth, centrifuged, and the pellet was washed twice in fresh non-antibiotic DMEM F12 media.  
243 Cell monolayers were then co-cultured with *B. thailandensis* or *B. vietnamiensis* at an MOI of  
244 1:10 for 3 h at 37° C, 5.5% CO<sub>2</sub> to allow intracellular invasion to occur. After 3 h, extracellular  
245 bacteria were removed by washing cells with PBS and replacing culture media supplemented  
246 with 250 µg/ml of kanamycin for 1 h. Thereafter, the cell monolayers were incubated (37° C) in  
247 media containing 50 µg/ml kanamycin for 1 h for a total of 2 h antibiotic treatment to completely  
248 kill any residual extracellular and attached bacteria. Following an additional PBS wash,  
249 intracellular bacteria were released after cell monolayers were lysed with PBS containing 0.1%  
250 Triton X-100 (total assay incubation time was 5 hours after initial monolayer exposure to  
251 bacteria). Viable intracellular bacteria were quantified by plating serial dilutions of the lysate,  
252 and average CFU determined. Bacterial intracellular invasion assays were replicated  
253 independently at least twice.

#### 254 *Statistical analysis*

255 The data analysis was completed using Prism 5.0 software (Graph Pad, 5.04, San Diego, CA).  
256 Assay replicate independence was determined by a one-way or two-way ANOVA with  
257 Bonferroni multiple comparisons, and Student's *t*-test. Additional statistics were performed using  
258 R, and non-parametric, unequal variances. A P value of less than 0.05 was considered  
259 significant.

## 260 **Results**

### 261 *C57BL/6 mice binge alcohol concentration profile and quantification of viable bacteria in the* 262 *blood after infection.*

263 To assess the temporal profile of a single binge alcohol episode in female C57BL/6 mice,  
264 a dose of 4.4 g/kg alcohol or PBS was administered IP. Blood was sampled and analyzed for  
265 blood alcohol concentration (BAC) in mg/dl. A maximum BAC of ~256 mg/dl was generated at

266 30 min post alcohol administration and was not statistically different at 60 min post alcohol. This  
267 dose is consistent with a blood alcohol level that can be achieved during an alcohol binge  
268 episode in humans [8]. At 360 min, the BAC declined to 27.6 mg/dl and was not detected (0.0  
269 mg/dl) by 480 min post alcohol (Figure 1A). No alcohol was detected in the non-alcohol  
270 administered control mice.

271 We then assessed the ability of *B. thailandensis* and *B. vietnamiensis* to spread to the  
272 blood stream with and without alcohol exposure (Figure 1B). Mice were administered a binge  
273 alcohol dose 30 min prior to infection, and blood was collected at 2 h PI and immediately spread  
274 on LB media plates. Control mice infected with *B. thailandensis* ( $10^5$  or  $10^6$ ) or *B. vietnamiensis*  
275 ( $10^6$ ) had significantly less bacteria in the blood compared to infected and alcohol treated mice.  
276 On average,  $5.8 \times 10^2$  CFU's were collected in the blood from *B. thailandensis* ( $10^5$ ) infected  
277 mice administered alcohol, compared to a 2-fold decrease in CFU from mice not administered  
278 alcohol ( $p = 0.0012$ ). Mice infected with *B. thailandensis* ( $10^6$ ) and administered alcohol,  
279 developed an average of  $4.5 \times 10^2$  CFU's in the blood compared to  $2.6 \times 10^2$  CFU's in non-  
280 alcohol treated mice ( $p = 0.013$ ). Interestingly, mice infected with *B. vietnamiensis* ( $10^6$ ) and  
281 administered the same binge alcohol dose developed the greatest bacterial load in the blood of  
282  $1.4 \times 10^3$  CFU. A 3-fold decrease in whole blood CFU was collected in non-alcohol treated mice  
283 infected with *B. vietnamiensis* ( $10^6$ ) compared to the binge alcohol treated group ( $p = 0.001$ )  
284 (Figure 1B). Thus, these data suggest that the administration of alcohol increases the  
285 dissemination of bacteria shortly after infection.

286 **Figure 1. Alcohol and Bacterial Load in Blood.** (A) Blood alcohol concentration (BAC).  
287 C57BL/6 mice were administered alcohol (4.4g/kg) or PBS intraperitoneally (i.p.). Blood was  
288 collected for BAC determination at 30, 60, 360, and 480 min post alcohol administration. Trend  
289 line represents the average of two independent determinations.  $n = 3$  per determination. (B) Mice  
290 were administered alcohol or PBS intraperitoneally (i.p.) and 30 min later mice were inoculated  
291 intranasally with *B. thailandensis* at doses of ( $3 \times 10^5$ ), ( $2 \times 10^6$ ), or *B. vietnamiensis* ( $2 \times 10^6$ ).

292 Blood was collected at 2 h post infection and *Burkholderia* species were grown on LB media  
293 plates to determine colony forming units (CFU). Bars represent the average CFU per treatment  
294 with SEM. Horizontal lines and asterisks (\*) represent statistical comparison of PBS (Non-  
295 Alcohol) control and alcohol treatment determined by Student's *t*-test,  $n = 4$ . \*\* $p \leq 0.01$ , \*\*\* $p \leq$   
296 0.001.

297  
298 *Binge alcohol increases bacterial loads in lung, spleen, and brain tissue after Burkholderia*  
299 *intranasal infection.*

300 *Burkholderia* infection is reliant on a balance between bacterial dissemination,  
301 proliferation, and clearance by host defense mechanisms. A single binge alcohol dose 30 min  
302 prior to infection lead to a greater systemic spread and could lead to a greater tissue colonization.  
303 Therefore, we investigated tissue burden after 24 and 72 h after infection with and without  
304 alcohol administration (Figure 2). A single alcohol dose 30 min prior to infection facilitated a  
305 greater bacterial lung, spleen, and brain burden at 24 and 72 h compared to all non-alcohol  
306 control groups (Figure 2). More specifically, bacteria were cultured from lung and spleen tissues  
307 in binge alcohol treated mice but were not detected (ND) in non-alcohol treated mice infected  
308 with *B. thailandensis* ( $10^5$ ) 24 h PI (Figure 2A). Conversely, bacterial burden in lung and spleen  
309 tissues were detected in non-alcohol treated mice infected with *B. thailandensis* ( $10^6$ ) or *B.*  
310 *vietnamiensis* ( $10^6$ ) 24 h PI (Figure 2 C, E). Mice infected with *B. thailandensis* ( $10^6$ ) or *B.*  
311 *vietnamiensis* ( $10^6$ ) and which received the binge alcohol dose presented a 2.5-fold increase in  
312 bacterial burden in lung and spleen tissues over non-alcohol treated mice 24 h PI (Figure C, E).  
313 No bacteria were cultured from brain tissue in any groups at 24 h PI (Figure 2 A, C, E).  
314 Interestingly, bacterial burden in spleen tissue was cleared from non-alcohol and binge alcohol  
315 treated mice infected with *B. thailandensis* ( $10^5$  or  $10^6$ ) (Figure 2 B, D), but detected in spleen  
316 tissue of *B. vietnamiensis* infected mice (Figure 2F). Although not statistically significant,  
317 greater bacterial burden was measured in lung and brain tissues of mice alcohol treated and *B.*  
318 *thailandensis* infected ( $10^5$ ) compared to non-alcohol control mice at 72 h (Figure 2B). Mice that

319 received an increased *B. thailandensis* ( $10^6$ ) dose and administered binge alcohol, developed a 4-  
320 fold increase in lung and brain bacterial burdens compared to non-alcohol controls (Figure 2D).  
321 The greatest bacterial burden ( $\sim 3 \times 10^6$ ) was localized in lung tissue of mice administered binge  
322 alcohol and infected with *B. vietnamiensis* ( $10^6$ ) 72 h PI (Figure 2F). Similarly, bacterial burden  
323 in lung, spleen and brain tissue of mice administered binge alcohol were significantly greater  
324 than non-alcohol control groups of mice infected with *B. vietnamiensis* ( $10^6$ ) (Figure 2F).  
325 Bacteria were cultured from brain tissue in both groups at 72 h PI (Figure 2 B, D, F). All mice  
326 survived by end-point, with mice infected and administered alcohol exhibiting weight loss and  
327 lethargy at 72 h PI. These data indicate that the temporal effects of a single binge alcohol episode  
328 can increase the dissemination of bacteria in a localized manner.

329 **Figure 2. Bacterial load in the lungs, spleen and brain of binge-alcohol mice intranasally**  
330 **infected with different *Burkholderia* species and doses.** Mice were administered alcohol  
331 (4.4g/kg) or PBS (i.p.). At 30 min. post binge alcohol mice were infected with *B. thailandensis*  
332 ( $3 \times 10^5$ ) (A-B), *B. thailandensis* ( $2 \times 10^6$ ) (C-D), or *B. vietnamiensis* ( $2 \times 10^6$ ) (E-F). Tissues  
333 were collected 24 h (A, D, C) or 72 h (B, D, F) later and bacterial tissue burden was determined  
334 (CFU/tissue). Asterisks (\*) represent statistical comparisons between alcohol treatment and  
335 (Non-Alcohol) control per tissue type determined by one-way ANOVA. Bars represent average  
336 CFU (n=4) with SEM. \*\*,  $p \leq 0.01$ , \*\*\*,  $p \leq 0.001$ , \*\*\*\*,  $p \leq 0.0001$ .

337  
338 *Binge alcohol exposure reduces GM-CSF in the lungs and increases IL-10 in the spleen after*  
339 *Burkholderia infection.*

340 The cytokine concentrations were measured at the site of bacterial challenge (the lungs).  
341 GM-CSF is produced by alveolar epithelium and binds to specific GM-CSF receptors on the  
342 membrane of alveolar macrophages that leads to maturation and differentiation of circulating  
343 monocytes. GM-CSF concentrations were decreased in the lungs of mice administered a single  
344 binge alcohol dose followed by *B. thailandensis* or *B. vietnamiensis* infections, compared to non-  
345 alcohol and infected control mice at 24 and 72 h PI (Figure 3 A, C, E). The greatest decrease in  
346 pulmonary GM-CSF was measured in mice administered alcohol and infected with *B.*

347 *vietnamiensis* ( $10^6$ ) at 72 h PI compared to non-alcohol controls (Figure 3E). Decreased  
348 concentrations of pulmonary TNF- $\alpha$  were collected in binge alcohol dose mice infected with *B.*  
349 *thailandensis* ( $10^5$ ) compared to control mice (Figure 3A). GM-CSF concentrations did not  
350 significantly change at 72 h compared to 24 h mice after *B. thailandensis* ( $10^5$ ) infection. In mice  
351 infected with *B. thailandensis* or *B. vietnamiensis* ( $10^6$ ), GM-CSF concentrations were elevated  
352 at 72 h above 24 h groups in both non-alcohol and binge alcohol mice (Figure 3 C, E). These  
353 data suggest that the alveolar macrophage associated response is dampened in alcohol treated  
354 mice.

355 Splenic cytokine secretion, a bacterial dissemination site after infection, was also  
356 determined in alcohol or PBS administered mice. IL-10 is a modulating cytokine that has been  
357 implicated as suppressing the protective immune response, while TNF-  $\alpha$  may be immune  
358 enhancing in murine models and in humans. Concentrations of IL-10 were elevated in the spleen  
359 of mice administered binge alcohol and infected, compared to non-alcohol and infected control  
360 mice at 24 and 72 h PI (Figure 3 B, D, F). Interestingly, IL-10 concentrations were elevated only  
361 at 24 h PI, while TNF- $\alpha$  was significantly decreased at 24 and 72 h in mice infected with *B.*  
362 *thailandensis* ( $10^5$ ) (Figure 3B). Splenic IL-10 concentrations were significantly elevated in mice  
363 administered binge alcohol and infected with *B. thailandensis* or *B. vietnamiensis* ( $10^6$ ) at 24 and  
364 72 h or only 72 h PI, respectively. These findings suggest splenic IL-10 may be modulating  
365 bacterial clearance in the spleen while dampening the lung immune response in alcohol treated  
366 mice.

367 **Figure 3. Pro-inflammatory cytokines in lung and spleen of binge alcohol mice intranasally**  
368 **infected with different *Burkholderia* species and doses.** Mice were treated as described in  
369 Figure 2 and infected with *B. thailandensis* ( $3 \times 10^5$ ) (A-B), *B. thailandensis* ( $2 \times 10^6$ ) (C-D),  
370 and *B. vietnamiensis* ( $2 \times 10^6$ ) (E-F). GM-CSF, TNF-  $\alpha$ , IL-10 concentrations were measured in  
371 lung homogenates (A, C, E). TNF-  $\alpha$  and IL-10 concentrations were measured in spleen  
372 homogenates (B, D, F), n = 4. Asterisks (\*) represent statistical comparisons between alcohol

373 treatment and (Non-Alcohol) control per cytokine determined by two-way ANOVA. Bars  
374 represent average concentration (n=?) with SEM indicated. \*,  $p \leq 0.05$ , \*\*,  $p \leq 0.01$ , \*\*\*,  $p \leq$   
375 0.001.  
376

377 *A single binge alcohol episode increases lung and brain barrier permeability in vivo.*

378 To determine if a single binge alcohol episode could increase lung and brain tissue  
379 membrane permeability we used Evans blue dye as an indicator of vascular leakage and tight  
380 junction integrity. Mice were administered a single dose of alcohol (4.4g/kg or PBS) 30 min  
381 prior to Evans blue dye administration (Figure 4). Mice administered binge alcohol showed  
382 increased vascular leakage of Evans blue into lung and brain tissues, however PBS treated mice  
383 had reduced infiltration of dye into brain and lung tissue (Figure 4 A, B). Brain tissue from mice  
384 administered binge alcohol displayed a 3-fold increase of Evans blue compared to the non-  
385 alcohol control mice. Interestingly, more total Evans blue leaked into lung tissue compared to  
386 brain tissue of alcohol and non-alcohol treated mice. Mice administered binge alcohol showed  
387 greater lung permeability compared to PBS controls, although not statistically significant. In  
388 combination, these results suggest that permeability could lead to a greater load of bacteria that is  
389 released into the blood.

390 **Figure 4. Lung and brain blood barrier permeability in binge alcohol mice.** Mice were  
391 administered alcohol (4.4 g/kg) or PBS (i.p.). At 30 min. post binge alcohol, mice were injected  
392 with Evans blue dye (EB). Mice were sacrificed 2 h post EB administration, perfused, and tissues  
393 collected. EB dye was extracted from the (A) Lung and (B) Brain tissues using formamide. The  
394 concentrations of EB per gram of tissue were determined by absorbance at 610nm. Bars  
395 represent the average concentration with SEM (n=3). Horizontal line and asterisks (\*) represent  
396 statistical comparison of PBS (Non-Alcohol) control and alcohol treatment determined by a  
397 Student's t-test, (B) \*\* $p \leq 0.01$ .  
398

399 *Binge alcohol reduces transepithelial electrical resistance (TEER) and increases paracellular*  
400 *permeability in lung epithelial and brain endothelial cells.*  
401  
402



403 To further investigate the effects of a single binge alcohol episode on tight junction  
404 dysfunction and lung and brain tissue permeability, TEER was utilized to measure lung epithelial  
405 (Eph4) or brain endothelial (bEnd.3) cell resistance in a transwell system (Figure 5). Both cell  
406 types were grown as described in Methods. For the first phase of experiments, membranes with  
407 pore diameter size of 0.4  $\mu\text{m}$  were used to support Eph4 cell growth, which represent the lung  
408 formed by pulmonary epithelium. The largest average TEER value  $2100 \pm 25 \Omega \text{ cm}^2$   
409 characterizes the tightest Eph4 cell monolayer. A significant decrease in TEER was observed  
410 from the Eph4 monolayer treated with 0.2% (50mM) alcohol v/v at 1 and 8 h post incubation,  
411 compared to the no alcohol treated cells ( $p \leq 0.0001$ ) (Figure 5A). For the second phase, bEnd.3  
412 brain endothelial cells were also grown on membranes with pore diameter size of 0.4  $\mu\text{m}$ , which  
413 represent an acceptable blood brain barrier (BBB) constituent [32]. The largest average TEER  
414 value  $230 \pm 5 \Omega \text{ cm}^2$  characterizes the tightest bEnd.3 cell monolayer. Similarly, an average  
415 decrease was recorded from the bEnd.3 monolayer treated with 0.2% (50mM) alcohol v/v at 1  
416 and 8 h compared to the no alcohol treated cells, ( $p \leq 0.01$ ) and ( $p \leq 0.0001$ ) respectively (Figure  
417 5B).

418 Cell monolayers were also characterized by FITC –Dextran permeability. A decrease in  
419 TEER value for binge alcohol dose treated cells was associated with an increase in FITC-  
420 Dextran paracellular permeability with both lung and brain cells supplemented with 0.2% v/v  
421 alcohol compared to non-alcohol controls ( $p \leq 0.0001$ ) and ( $p \leq 0.001$ ) respectively (Figure 5C).  
422 No cell death was observed in the monolayers treated with the binge alcohol dose. Taken  
423 together, these results propose bacterial bi-directional diffusion across paracellular space in mice  
424 administered alcohol.

425 **Figure 5. Lung epithelial and brain endothelial cell permeability with and without alcohol**  
426 **treatment. (A) Lung epithelial (Eph4) and (B) brain endothelial (bEnd.3) cell transepithelial**

427 resistance (TEER) was measured in cell monolayers grown in F12 media in 0.4-micron pore  
428 diameter membrane inserts. Media was supplemented with 0.0% or 0.2% v/v alcohol and TEER  
429 was measured at 1 and 8 h post alcohol administration. In panel (C), the permeability was  
430 determined in both cells by adding FITC-Dextran (10 KDa) to the apical side and measured in  
431 the baso-lateral side at 2 h post alcohol administration. Bars represent the average TEER across  
432 the permeable membrane per treatment with SEM. Horizontal lines and asterisks (\*) represent  
433 statistical comparison of PBS (Non-Alcohol) control and alcohol treatment determined by  
434 Student's t-test at each time point, (A-C) \*\* $p \leq 0.01$ , \*\*\* $p \leq 0.0001$ .  
435

436 *Binge alcohol increases intracellular invasion of lung epithelial and brain endothelial cells.*

437  
438 To further examine the paracellular diffusion results, non-phagocytic lung epithelial and  
439 brain endothelial cells were tested for intracellular invasion susceptibility during a binge alcohol  
440 dose. Monolayers were formed and co-cultured in with or without alcohol. The results in Fig. 6  
441 show the average number of CFUs, demonstrating viable *B. thailandensis* or *B. vietnamiensis*  
442 isolated 3 h after challenge. Although not statistically significant, *B. thailandensis* infected lung  
443 epithelial cells treated with binge alcohol resulted in a ~ 2-fold increase in intracellular invasion  
444 compared to non-alcohol treated cells. *B. vietnamiensis* invasion of binge alcohol treated lung  
445 epithelial cells resulted in an ~ 3.5-fold increase compared to non-alcohol treated cells (Figure  
446 6A). Both *Burkholderia* strains increased effective intracellular invasion and survival when  
447 alcohol was present (Fig. 6 A, B). Comparably, a ~3-fold increase in viable *B. thailandensis* was  
448 recovered from brain endothelial cells treated with binge alcohol, while a 2-fold increase in  
449 intracellular invasion resulted from *B. vietnamiensis* infected brain endothelial cells treated with  
450 binge alcohol, compared to non-alcohol treated cells (Figure 6B). Intriguingly, brain endothelial  
451 cells were more susceptible to *B. vietnamiensis* intracellular invasion compared to *B.*  
452 *thailandensis* in both alcohol and non-alcohol groups (statistical comparison not shown), with  
453 greater bacteria recovered from binge alcohol treated brain endothelial cells (Fig. 6B). These

454 findings suggest a single binge alcohol episode increases bacterial survival and dissemination  
455 through an increase in intracellular invasion of non-phagocytic cells.  
456 **Figure 6. Bacterial invasion and survival in non-phagocytic lung and brain cells with and**  
457 **without alcohol treatment. (A)** Lung epithelial and **(B)** brain endothelial cells were grown to  
458 confluency in F12 cell culture media and co-cultured with *B. thailandensis* or *B. vietnamiensis*  
459 (MOI 1:10) for 3 h in media supplemented with 0.0% or 0.2% v/v alcohol. Extracellular bacteria  
460 were removed by washes X4 and antibiotic treatment for 2 h. Cells were lysed and viable  
461 bacteria recovered. Asterisks (\*) represent statistical comparisons between alcohol treatment and  
462 (Non-Alcohol) control determined by one-way ANOVA. Bars represent average CFU with SEM.  
463 \*\*,  $p \leq .01$ ; \*\*\*,  $p \leq .001$ ; \*\*\*\*,  $p \leq 0.0001$ .

#### 464 **Discussion**

465 Binge alcohol intoxication has been recognized as a risk factor for infections including  
466 pneumonia and other sepsis [38]. Our previous studies have indicated that binge alcohol  
467 exposure of alveolar macrophages before or after infection decreased resistance to infection, in  
468 part by decreasing inflammatory mediators and phagocytic mechanisms [26]. Melioidosis has  
469 been linked to binge alcohol use through epidemiological studies, but the effects of binge alcohol  
470 exposure on pathogenic or less-pathogenic *Burkholderia* strains and innate immunity have not  
471 been examined *in vivo*. This was the basis for our working hypothesis that the same innate  
472 dysfunction observed *in vitro* would occur in our binge alcohol mouse model. In addition, we  
473 hypothesized that a lone binge alcohol episode would enhance the virulence of less pathogenic  
474 and opportunistic *Burkholderia* spp.

475 In the present study we used the less-pathogenic *B. thailandensis* E264 and the  
476 opportunistic *B. vietnamiensis*, a strain that infects cystic fibrosis patients, as models to study the

477 effects of binge alcohol consumption on infection. We observed an increase in *Burkholderia*  
478 species dissemination into the blood as early as 2 h PI, and greater bacterial loads in lung and  
479 spleen tissues 24 h PI in mice that had blood alcohol levels equivalent to a binge alcohol episode  
480 compared to mice that did not receive alcohol. Interestingly, the binge alcohol dose administered  
481 was completely cleared from the blood of mice by 8 h post administration (Figure 1), and yet a  
482 clear dysfunction of bacterial clearance from tissues was still dampened or delayed (16 and 64 h  
483 after alcohol was cleared).

484 Sufficient inflammatory infiltrates in non-alcohol treated C57BL/6 mice may explain, in  
485 part, the clearance of bacteria from tissues with *B. thailandensis* infections at  $10^5$  or  $10^6$  CFU.  
486 Similarly, other groups using C57BL/6 intranasal mouse models have reported that infiltration of  
487 macrophages within the first 3 days of infection may serve to contain *B. thailandensis* or *B.*  
488 *pseudomallei* for a longer period than in BALB/c mice, allowing the initiation of an adequate  
489 immune response (16, 36). The ability of *B. vietnamiensis* and other closely related *B.*  
490 *cenocepacia* species to cause severe infection in patients with cystic fibrosis led to the use of a  
491 Florida, USA strain collected from soil [22]. A more complete understanding of the effects of  
492 binge alcohol on a known human pathogen would potentially allow for the development of  
493 effective preventative strategies for highly virulent *B. pseudomallei*. Mice exposed to alcohol and  
494 infected with *B. vietnamiensis* exhibited greater bacterial colonization of the lung and spleen at  
495 24 h PI and retained significant bacterial loads in the spleen at 72 h PI, compared to mice  
496 infected with *B. thailandensis* (Fig. 2). Considering the rapid immunological response and  
497 tolerance of C57BL/6 mice to *Burkholderia* species infections, these findings reveal that a single  
498 binge alcohol episode can increase tissue colonization while suppressing innate immunity in both  
499 *B. thailandensis* and *B. vietnamiensis* infections.

500 To better understand tissue colonization and the modulatory effects of binge alcohol on  
501 innate immunity, tissue cytokines were examined. The cytokine, GM-CSF has a dual role in  
502 augmenting the accumulation and activation of both neutrophils and macrophages that boosts the  
503 infection-fighting ability of host lung defenses [35, 37]. We have observed previously that  
504 macrophages are dysfunctional after alcohol treatment *in vitro* [26]. From our study, GM-CSF  
505 and modulating cytokine TNF- $\alpha$  were elevated as early as 24 h in lung and spleen tissues in mice  
506 infected with *B. thailandensis* or *B. vietnamiensis* at differing doses in the absence of alcohol  
507 compared to mice that received alcohol (Figure 3). Moreover, binge alcohol administration  
508 consistently reduced GM-CSF with mild effects on TNF-  $\alpha$  in the lungs, compared to elevated  
509 levels in non-binge drunk mice. These pulmonary results indicate a reduction in activated  
510 neutrophils and macrophages [28]. Intriguingly, elevated IL-10 in the spleen of binge drunk mice  
511 infected with *B. thailandensis* may provide insight into the modulatory effect of binge alcohol on  
512 the general inflammatory cytokine profile of innate immune cells [13]. Although outside the  
513 scope of this study, it is plausible that a cytokine “storm” may be induced in the spleen of  
514 C57BL/6 mice during prolonged infections. Binge alcohol may directly or indirectly mitigate  
515 these detrimental cytokine effects by augmenting the production of regulatory IL-10 in TLR 4  
516 stimulated cells, which reduces inflammation and improves bacterial clearance in the spleen and  
517 not in the lungs [6]. Our data suggests the effects of binge alcohol may not only be dose  
518 dependent, but also tissue specific [46]. The tissue specific effects of binge alcohol and the  
519 modulating effects of cytokines are novel and interesting future studies that remain to be  
520 elucidated. Unlike binge alcohol dose administered mice infected with *B. thailandensis*, the  
521 spleen of mice infected with *B. vietnamiensis* did not express elevated IL-10 at 24 h PI. A mild

522 anti-inflammatory response suggests differences in the host-pathogen interaction with *B.*  
523 *vietnamiensis* in which there is a greater tissue colonization and dissemination.

524 Although *B. vietnamiensis* is phylogenetically more distant to *B. pseudomallei* than *B.*  
525 *thailandensis*, it shares virulence factors with *B. pseudomallei* [49]. Extracellular lipase,  
526 metalloproteases, and proteases are thought to play roles directly related to the invasion and  
527 interaction with epithelial cells [31]. Relatedly, type I and type II secretion systems in *B.*  
528 *vietnamiensis* isolates were shown to be responsible for the secretion of proteins with hemolytic  
529 activity [18]. Similar to cystic fibrosis patients, pulmonary manifestations such as defective  
530 mucociliary function in binge drunk mice and humans predisposes to respiratory infections [25].  
531 Our data illustrate that the evolutionary mechanisms utilized by *B. vietnamiensis* to colonize  
532 cystic fibrosis patients can be applied to our model of binge alcohol intoxication. Reinforcing  
533 these observations, Conway et al. (2004) have also shown that exopolysaccharide (EPS)  
534 produced by *B. cenocepacia* species interfered with phagocytosis of bacteria by human  
535 neutrophils and facilitated bacterial persistence in a mouse model of infection [12]. EPS was also  
536 found to inhibit neutrophil chemotaxis and production of oxygen reactive species [10]. Our  
537 mouse model intimates that binge alcohol creates a microenvironment in the host that could  
538 exacerbate infection by *Burkholderia* strains that are not commonly found in humans [1, 27].

539 In our study, *Burkholderia* near-neighbors were administered via the airways. We  
540 consider this route of infection more clinically relevant than subcutaneous or intraperitoneal  
541 injection. Nevertheless, humans usually acquire melioidosis by inoculation through skin  
542 abrasions, inhalation/aspiration and ingestion [48]. Although it is well documented that *B.*  
543 *pseudomallei* can be readily distinguished from *B. thailandensis*, the mechanism whereby the  
544 highly virulent *B. pseudomallei* causes disease in humans and animals is not well understood.

545 Tan et al. (2008) speculated that a more lethal inhalational route of infection such as  
546 aerosolization is retained in the lungs, whereas an inoculum of bacteria delivered intranasally  
547 tends to be lodged in the nasal passage [48]. Our data indicate that binge alcohol consumption  
548 increases bacterial localization to the lungs and dissemination to the brain via an intranasal route  
549 of infection by 72 h PI. Neurological melioidosis is less frequently reported. *B. pseudomallei* can  
550 enter the brain and spinal cord via nasal branches of the trigeminal or olfactory nerve. Two  
551 alternative routes by which bacteria can reach the brain are via epithelial cell invasion and  
552 crossing the blood-brain barrier (BBB) [47]. To our knowledge, our study is the first to show  
553 *Burkholderia* near-neighbor distribution in to the brain. Our data suggest a singular binge alcohol  
554 episode could modulate nasal mucosa and related upper respiratory defenses that lead to greater  
555 pulmonary and neurological infections [47].

556 Interestingly, bacteria at low numbers were still observed in the lung and brain tissues of  
557 mice not administered alcohol and infected with *B. thailandensis* or *B. vietnamiensis*. These  
558 observations lead us to develop an *in vitro* system to test the effects of binge alcohol on lung and  
559 brain permeability and epithelial cell invasion. Epithelial and endothelial barrier integrity has a  
560 significant role in preventing bacterial translocation into the brain or other tissues [52]. To  
561 determine if a single binge alcohol dose increases lung and brain tissue permeability, we  
562 evaluated barrier leakiness using Evans blue dye 2 h post binge alcohol *in vivo* and discovered  
563 that the permeability of these tissues was induced by the alcohol (Figure 4). Consistent with this  
564 result, hazardous alcohol consumption in mice induces disruption of the colonic mucosal barrier  
565 that leads to leakage of bacterial toxins [34]. Likewise, primary cultured brain endothelial cells  
566 treated with 0.23 % (50mM) alcohol impairs BBB integrity *in vitro* [32]. In the present study, the  
567 TEER and FITC dextran flux rate were utilized to estimate the effects of binge alcohol on the

568 paracellular permeability of lung epithelial (EpH4) and brain endothelial cell (bEndo.3)  
569 monolayers. The flow of ions in the paracellular gap was quantified by the TEER values. Our  
570 results showed that binge alcohol induced a significant decrease in TEER that remained  
571 suppressed for 8 h after a single alcohol treatment. A significant correlation was present between  
572 the decrease in the TEER value and the increase in the FITC dextran flux rate 2 h post binge  
573 alcohol administration. The increases in the FITC flux rate is especially relevant because infected  
574 mice treated with alcohol demonstrated elevated whole blood CFUs 2 h PI. It is possible that  
575 binge alcohol directly influences bacterial passage through epithelial or endothelial tight  
576 junctions [3]. However, it is unclear whether the impact of binge alcohol on tissue colonization is  
577 caused by modifications to epithelial raft structures, allowing for greater attachment, invasion,  
578 and bacterial survival; or synergy between transcellular and paracellular bacterial diffusion,  
579 aggravated by tight junction dysfunction [4].

580 Intracellular invasion of host cells is a successful survival strategy of many Gram-  
581 negative bacteria [29]. Furthermore, our previous data showed that low level alcohol exposure of  
582 *B. thailandensis* resulted in a reduction in motility and greater biofilm formation [26]. We  
583 speculated that these changes induced by alcohol could promote greater cellular attachment,  
584 invasion, and survival. Although *B. thailandensis* and *B. vietnamiensis* have been found  
585 intracellularly in both phagocytic and non-phagocytic cells, a quantitative study of alcohol-  
586 induced invasion of non-phagocytic epithelial cells has never been conducted. The results  
587 obtained in the present study demonstrated that binge alcohol significantly increased the invasion  
588 of both lung and brain non-phagocytic cells. Remarkably, less virulent *B. thailandensis* invaded  
589 lung epithelial cells at similar levels as *B. vietnamiensis* when cell monolayers were treated with  
590 alcohol during infection. Brain endothelial cells were more susceptible to *B. vietnamiensis* when



591 exposed to alcohol. Our future studies will examine the effect of binge alcohol on the molecular  
592 mechanism of *Burkholderia* virulence and intracellular invasion with genomic and proteomics  
593 approaches [44, 54].

594 The data from the present study provide an important framework for *Burkholderia* near-  
595 neighbor virulence when patients engage in hazardous alcohol consumption. Our results showed  
596 that under binge alcohol conditions, intranasal infection with a less-pathogenic *B. thailandensis*  
597 can increase its infectivity, while diffusing into the blood stream. When using *B. vietnamiensis*,  
598 our findings indicate that a single binge alcohol episode increased *B. vietnamiensis* infectivity to  
599 a greater extent compared to *B. thailandensis*. Moreover, our findings provide novel insights into  
600 a possible mode of action for bacterial tissue colonization and dissemination via bacterial  
601 movement through paracellular space and intracellular invasion of non-phagocytic cells during  
602 binge alcohol exposure. The data from these studies support the public health responses being  
603 developed in melioidosis-endemic regions that emphasize the nature of alcohol consumption as a  
604 prime concern [14]. Emphasis is being placed on the dangers of binge drinking, especially  
605 around potential times of exposure to environmental *B. pseudomallei*, such as occurs with severe  
606 weather events and with certain occupations.

#### 607 **Acknowledgements**

608 We thank Northern Arizona University's animal facility veterinarian and staff for  
609 providing guidance and training. We thank research associates at The Pathogen and Microbiome  
610 Institute and The Monroy lab at NAU for guidance and research support. In addition, we give our  
611 thanks to Dr. Nathan Nieto, from the Biology Department at NAU for helpful suggestions.

#### 612 **References:**

- 613 1. Allwood EM, Devenish RJ, Prescott M, Adler B, Boyce JD. Strategies for intracellular  
614 survival of *Burkholderia pseudomallei*. *Front Microbiol.* 2011;170(2):1-18.

- 615 2. Antony VB, Godbey SW, Hott JW, Sherry QF. Alcohol-Induced Inhibition of Alveolar  
616 Macrophage Oxidant Release in Vivo and in Vitro. *Alcohol Clin Exp Res*.  
617 1993;17(2):389–93.
- 618 3. Balda MS, Matter K. Size-selective assessment of tight junction paracellular permeability  
619 using fluorescently labelled dextrans. 2007;(1):1-2.
- 620 4. Basuroy S, Sheth P, Mansbach CM, Rao RK. Acetaldehyde disrupts tight junctions and  
621 adherens junctions in human colonic mucosa: protection by EGF and L-glutamine. *Am J*  
622 *Physiol Gastrointest Liver Physiol* [Internet]. 2005;289(2):G367-75. Available from:  
623 <http://www.ncbi.nlm.nih.gov/pubmed/15718285>
- 624 5. Bermudez LE, Young LS, Martinelli J, Petrofsky M. Exposure to ethanol up-regulates the  
625 expression of Mycobacterium avium complex proteins associated with bacterial virulence.  
626 *J Infect Dis*. 1993;168(4):961–8.
- 627 6. Bhatta M, Jan BL, Tan W, Pruett SB, Nanduri B. Role of acute ethanol exposure and  
628 TLR4 in early events of sepsis in a mouse model. *Alcohol*. 2011;45(8):795–803.  
629 Available from: <http://dx.doi.org/10.1016/j.alcohol.2011.07.003>
- 630 7. Bhatta M, Pruett SB, Swiatlo E, Nanduri B. Alcohol abuse and Streptococcus pneumoniae  
631 infections: Consideration of virulence factors and impaired immune responses. *Alcohol*  
632 [Internet]. 2011;45(6):523–39. Available from:  
633 <http://dx.doi.org/10.1016/j.alcohol.2011.02.305>
- 634 8. Bhatta M, Tan W, Basco M, Pruett S, Nanduri B. Binge alcohol consumption 18 h after  
635 induction of sepsis in a mouse model causes rapid overgrowth of bacteria, a cytokine  
636 storm, and decreased survival. *Alcohol*. 2017;63:9-17.
- 637 9. Boé DM, Nelson S, Zhang P, Bagby GJ. Acute ethanol intoxication suppresses lung  
638 chemokine production following infection with Streptococcus pneumoniae. *J Infect Dis*.  
639 2001;184(9):1134–42.
- 640 10. Bylund J, Burgess L-A, Cescutti P, Ernst RK, Speert DP. Exopolysaccharides from  
641 Burkholderia cenocepacia Inhibit Neutrophil Chemotaxis and Scavenge Reactive Oxygen  
642 Species. *The Journal of Biological Chemistry*. 2005;281(5):2526-2532. Available from:  
643 <http://www.jbc.org/content/281/5/2526.full.pdf>
- 644 11. Camarena L, Bruno V, Euskirchen G, Poggio S, Snyder M. Molecular mechanisms of  
645 ethanol-induced pathogenesis revealed by RNA-sequencing. *PLoS Pathog*.  
646 2010;6(4):e1000834.
- 647 12. Conway B-AD, Chu KK, Bylund J, Altman E, Speert DP. Production of  
648 Exopolysaccharide by Burkholderia cenocepacia Results in Altered Cell-Surface  
649 Interactions and Altered Bacterial Clearance in Mice. *The Journal of Infectious Diseases*.  
650 2004;190:957-966. Available from: <https://watermark.silverchair.com/190-5-957.pdf>

- 651 13. Crews FT, Bechara R, Brown LA, Guidot DM, Mandrekar P, Oak S, et al. Cytokines and  
652 alcohol. *Alcohol Clin Exp Res.* 2006;30(4):720–30. Available from:  
653 <http://www.ncbi.nlm.nih.gov/pubmed/16573591>
- 654 14. Currie BJ. Melioidosis : Evolving Concepts in Epidemiology , Pathogenesis , and  
655 Treatment. *Semin Respir Crit Care Med.* 2015;36:111–25.
- 656 15. Currie BJ, Jacups SP, Cheng AC, Fisher DA, Anstey NM, Huffam SE, et al. Melioidosis  
657 epidemiology and risk factors from a prospective whole-population study in northern  
658 Australia. *Trop Med Int Health.* 2004 Nov;9(11):1167–74. Available from:  
659 <http://www.ncbi.nlm.nih.gov/pubmed/15548312>
- 660 16. D’Souza El-Guindy N. KJE et al. Laboratory models available to study alcohol-induced  
661 organ damage and immune variations; choosing the appropriate model. *Alcohol Clin Exp*  
662 *Res.* 2010;34(9):997–1003.
- 663 17. Eysseric, H., Gonthier, B., Soubeyran, A., Bessard, G., Saxrod, R., & Barret, L. There is  
664 no simple method to maintain a constant ethanol concentration in long-term cell culture:  
665 Keys to a solution applied to the survey of astrocytic ethanol absorption. *Alcohol*, 1997;  
666 14, 111-115.
- 667 18. Fehlner-Gardiner CC, Hopkins TMH, Valvano MA. Identification of a general secretory  
668 pathway in a human isolate of burkholderia vietnamiensis (formerly *B. cepacia* complex  
669 genomovar V) that is required for the secretion of hemolysin and phospholipase C  
670 activities. *Microb Pathog.* 2002;
- 671 19. Goral J, Karavitis J, Kovacs EJ. Exposure-dependent effects of ethanol on the innate  
672 immune system. *Alcohol.* 2008;42(4):237–47.
- 673 20. Gordon SB, Irving GRB, Lawson R a, Lee ME, Read RC. Intracellular Trafficking and  
674 Killing of *Streptococcus pneumoniae* by Human Alveolar Macrophages Are Influenced by  
675 Opsonins Intracellular Trafficking and Killing of *Streptococcus pneumoniae* by Human  
676 Alveolar Macrophages Are Influenced by Opsonins. *Society.* 2000;
- 677 21. Grahame NJ, Grose AM. Blood alcohol concentrations after scheduled access in high-  
678 alcohol- preferring mice. *Alcohol.* 2003;31(1–2):99–104.
- 679 22. Hall CM, Busch JD, Shippy K, Allender CJ, Kaestli M, Mayo M, et al. Diverse  
680 *Burkholderia* species isolated from soils in the southern United States with no evidence of  
681 *B. pseudomallei*. *PLoS One.* 2015;10(11):1–15.
- 682 23. Haraga A, West TE, Brittnacher MJ, Skerrett SJ, Miller SI. *Burkholderia thailandensis* as  
683 a model system for the study of the virulence-associated type III secretion system of  
684 *Burkholderia pseudomallei*. *Infect Immun [Internet].* 2008;76(11):5402–11. Available  
685 from:

- 686 [http://www.pubmedcentral.nih.gov/articlerender.fcgi?artid=2573339&tool=pmcentrez&re](http://www.pubmedcentral.nih.gov/articlerender.fcgi?artid=2573339&tool=pmcentrez&rendertype=abstract)  
687 [ndertype=abstract](http://www.pubmedcentral.nih.gov/articlerender.fcgi?artid=2573339&tool=pmcentrez&rendertype=abstract)
- 688 24. Haseba T, Kameyama K, Mashimo K, Ohno Y. Dose-Dependent Change in Elimination  
689 Kinetics of Ethanol due to Shift of Dominant Metabolizing Enzyme from ADH 1 (Class I)  
690 to ADH 3 (Class III) in Mouse. *Int J Hepatol.* 2012;2012(Class III):1–8. Available from:  
691 <http://www.hindawi.com/journals/ijh/2012/408190/>
- 692 25. Jerrells TR, Sibley D. Effects of Ethanol on Cellular Immunity to Facultative  
693 Intracellular Bacteria. *Alcohol Clin Exp Res.* 1995;19(1):11-16.
- 694 26. Jimenez V, Moreno R, Kaufman E, Hornstra H, Settles E, Currie BJ, et al. Effects of  
695 binge alcohol exposure on *Burkholderia thailandensis*–alveolar macrophage interaction.  
696 *Alcohol.* 2017;64:55–63. Available from: <http://dx.doi.org/10.1016/j.alcohol.2017.04.004>
- 697 27. Jones AL, Beveridge TJ, Woods DE. Intracellular survival of *Burkholderia pseudomallei*.  
698 *Infect Immun.* 1996;64(3):782–90. Available from:  
699 [http://www.pubmedcentral.nih.gov/articlerender.fcgi?artid=173838&tool=pmcentrez&ren](http://www.pubmedcentral.nih.gov/articlerender.fcgi?artid=173838&tool=pmcentrez&rendertype=abstract)  
700 [dertype=abstract](http://www.pubmedcentral.nih.gov/articlerender.fcgi?artid=173838&tool=pmcentrez&rendertype=abstract)
- 701 28. Joshi PC, Applewhite L, Ritzenthaler JD, Roman J, Fernandez AL, Eaton DC, et al.  
702 Chronic Ethanol Ingestion in Rats Decreases Expression and Downstream Signaling in  
703 the. 2005;175:6837-6845.
- 704 29. Kespichayawattana W, Intachote P, Utaisincharoen P, Sirisinha S. Virulent *Burkholderia*  
705 *pseudomallei* is more efficient than avirulent *Burkholderia thailandensis* in invasion of  
706 and adherence to cultured human epithelial cells. *Microb Pathog.* 2004;36:287-292.
- 707 30. Lazar Adler NR, Govan B, Cullinane M, Harper M, Adler B, Boyce JD. The molecular  
708 and cellular basis of pathogenesis in melioidosis: how does *Burkholderia pseudomallei*  
709 cause disease? *FEMS Microbiol Rev* [Internet]. 2009 Nov [cited 2014 May  
710 16];33(6):1079–99. Available from: <http://www.ncbi.nlm.nih.gov/pubmed/19732156>
- 711 31. Leitão JH, Sousa SA, Ferreira AS, Ramos CG, Silva IN, Moreira LM. Pathogenicity,  
712 virulence factors, and strategies to fight against *Burkholderia cepacia* complex pathogens  
713 and related species. *Applied Microbiology and Biotechnology.* 2010;87:31-40.
- 714 32. Li G, Simon MJ, Cancel LM, Shi ZD, Ji X, Tarbell JM, et al. Permeability of endothelial  
715 and astrocyte cocultures: In vitro Blood-brain barrier models for drug delivery studies.  
716 *Ann Biomed Eng.* 2010;38(8):2499-2511.
- 717 33. Lim JP, Zou ME, Janak PH, Messing RO. Responses to ethanol in C57BL/6 versus  
718 C57BL/6 × 129 hybrid mice. *Brain Behav.* 2012;2(1):22–31.
- 719 34. Mir H, Meena AS, Chaudhry KK, Shukla PK, Gangwar R, Manda B, et al. Occludin  
720 deficiency promotes ethanol-induced disruption of colonic epithelial junctions, gut barrier

- 721 dysfunction and liver damage in mice. *Biochim Biophys Acta - Gen Subj.* 2016;1860:765-  
722 774.
- 723 35. Miyagi K, Kawakami K, Saito A. Role of Reactive Nitrogen and Oxygen Intermediates in  
724 Gamma Interferon-Stimulated Murine Macrophage Bactericidal Activity Against  
725 *Burkholderia pseudomallei*. *Infect Immun.* 1997;65(10):4108–13.
- 726 36. Morici LA, Heang J, Tate T, Didier PJ, Roy CJ. Differential susceptibility of inbred  
727 mouse strains to *Burkholderia thailandensis* aerosol infection. *Microb Pathog.*  
728 2010;48(1):9–17. Available from: <http://dx.doi.org/10.1016/j.micpath.2009.10.004>
- 729 37. Nelson, Steve, Bagby, Gregory, Anderson, Jeff, Nakamura, Chester, Shellito, Judd,  
730 Summer W. The Effects of Ethanol, Tumor Necrosis Factor, and Granulocyte Colony-  
731 Stimulating Factor on Lung Antibacterial Defenses. 1991;245–53.
- 732 38. Nelson S, Kolls JK. Alcohol, host defense and society. *Nat Rev Immunol.* 2002;2(3):205–  
733 9.
- 734 39. Novem V, Shui G, Wang D, Bendt AK, Sim SH, Liu Y, et al. Structural and biological  
735 diversity of lipopolysaccharides from *Burkholderia pseudomallei* and *Burkholderia*  
736 *thailandensis*. *Clin Vaccine Immunol [Internet].* 2009;16(10):1420–8. Available from:  
737 [http://www.pubmedcentral.nih.gov/articlerender.fcgi?artid=2756838&tool=pmcentrez&re](http://www.pubmedcentral.nih.gov/articlerender.fcgi?artid=2756838&tool=pmcentrez&rendertype=abstract)  
738 [ndertype=abstract](http://www.pubmedcentral.nih.gov/articlerender.fcgi?artid=2756838&tool=pmcentrez&rendertype=abstract)
- 739 40. Nwugo CC, Arivett BA, Zimble DL, Gaddy JA, Richards AM, Actis LA. Effect of  
740 Ethanol on Differential Protein Production and Expression of Potential Virulence  
741 Functions in the Opportunistic Pathogen *Acinetobacter baumannii*. *PLoS One.*  
742 2012;7(12):12(7):1-16.
- 743 41. Pruett SB, Schwab C, Zheng Q, Fan R. Suppression of innate immunity by acute ethanol  
744 administration: a global perspective and a new mechanism beginning with inhibition of  
745 signaling through TLR3. *J Immunol.* 2004;173(4):2715–24.
- 746 42. Rainbow L, Hart CA, Winstanley C. Distribution of type III secretion gene clusters in  
747 *Burkholderia pseudomallei*, *B. thailandensis* and *B. mallei*. *J Med Microbiol.*  
748 2002;51(5):374–84.
- 749 43. Samuelson DR, Shellito JE, Maffei VJ, Tague ED, Campagna SR, Blanchard EE, et al.  
750 Alcohol-associated intestinal dysbiosis impairs pulmonary host defense against *Klebsiella*  
751 *pneumoniae*. *PLoS Pathog.* 2017;13(6):1-25.
- 752 44. Sarovich DS, Price EP, Webb JR, Ward LM, Voutsinos MY, Tuanyok A, et al. Variable  
753 virulence factors in *Burkholderia pseudomallei* (Meloidosis) associated with human  
754 disease. *PLoS One.* 2014;9(3):1–4.

- 755 45. Settles EW, Moser LA, Harris TH, Knoll LJ. Toxoplasma gondii upregulates interleukin-  
756 12 to prevent Plasmodium berghei-induced experimental cerebral malaria. Infect Immun.  
757 2014;82(3):1343-1353.
- 758 46. Sibley D, Jerrells TR. Alcohol consumption by C57BL/6 mice is associated with depletion  
759 of lymphoid cells from the gut-associated lymphoid tissues and altered resistance to oral  
760 infections with Salmonella typhimurium. J Infect Dis [Internet]. 2000;182(2):482–9.  
761 Available from: <http://www.ncbi.nlm.nih.gov/pubmed/10915079>
- 762 47. St John JA, Walkden H, Nazareth L, Beagley KW, Ulett GC, Batzloff MR, et al.  
763 Burkholderia pseudomallei rapidly infects the brain stem and spinal cord via the  
764 trigeminal nerve after intranasal inoculation. Infect Immun. 2016;84(9):2681–8.
- 765 48. Tan GYG, Liu Y, Sivalingam SP, Sim SH, Wang D, Paucod JC, et al. Burkholderia  
766 pseudomallei aerosol infection results in differential inflammatory responses in BALB/c  
767 and C57Bl/6 mice. J Med Microbiol. 2008;57(4):508–15.
- 768 49. Tuanyok A, Mayo M, Scholz H, Hall CM, Allender CJ, Kaestli M, et al. Burkholderia  
769 humptydooensis sp. nov., a new species related to Burkholderia thailandensis and the fifth  
770 member of the Burkholderia pseudomallei complex. Appl Environ Microbiol. 2017;83  
771 (5):1-10.
- 772 50. Wiersinga WJ, Currie BJ, Peacock SJ. Melioidosis. N Engl J Med [Internet]. 2012 Sep 13  
773 [cited 2014 Nov 9];367(11):1035–44. Available from:  
774 <http://www.ncbi.nlm.nih.gov/pubmed/22970946>
- 775 51. Wiersinga WJ, De Vos AF, De Beer R, Wieland CW, Roelofs JJTH, Woods DE, et al.  
776 Inflammation patterns induced by different Burkholderia species in mice. Cell Microbiol.  
777 2008;10(1):81–7.
- 778 52. Wuest DM, Wing AM, Lee KH. Membrane configuration optimization for a murine in  
779 vitro blood-brain barrier model. J Neurosci Methods [Internet]. 2013;212(2):211–21.  
780 Available from: <http://dx.doi.org/10.1016/j.jneumeth.2012.10.016>
- 781 53. Ying W, Jing T, Bing C, Baifang W, Dai Z, Bingyuan W. Effects of alcohol on intestinal  
782 epithelial barrier permeability and expression of tight junction-associated proteins. Mol  
783 Med Rep. 2014;9:2352-2356.
- 784 54. Yu Y, Kim HS, Chua HH, Lin CH, Sim SH, Lin D, et al. Genomic patterns of pathogen  
785 evolution revealed by comparison of Burkholderia pseudomallei, the causative agent of  
786 melioidosis, to avirulent Burkholderia thailandensis. BMC Microbiol. 2006; 6:46.  
787 Available from:  
788 [http://www.pubmedcentral.nih.gov/articlerender.fcgi?artid=1508146&tool=pmcentrez&re](http://www.pubmedcentral.nih.gov/articlerender.fcgi?artid=1508146&tool=pmcentrez&rendertype=abstract)  
789 [ndertype=abstract](http://www.pubmedcentral.nih.gov/articlerender.fcgi?artid=1508146&tool=pmcentrez&rendertype=abstract)

**A.**

■ Alcohol  
● Non-Alcohol

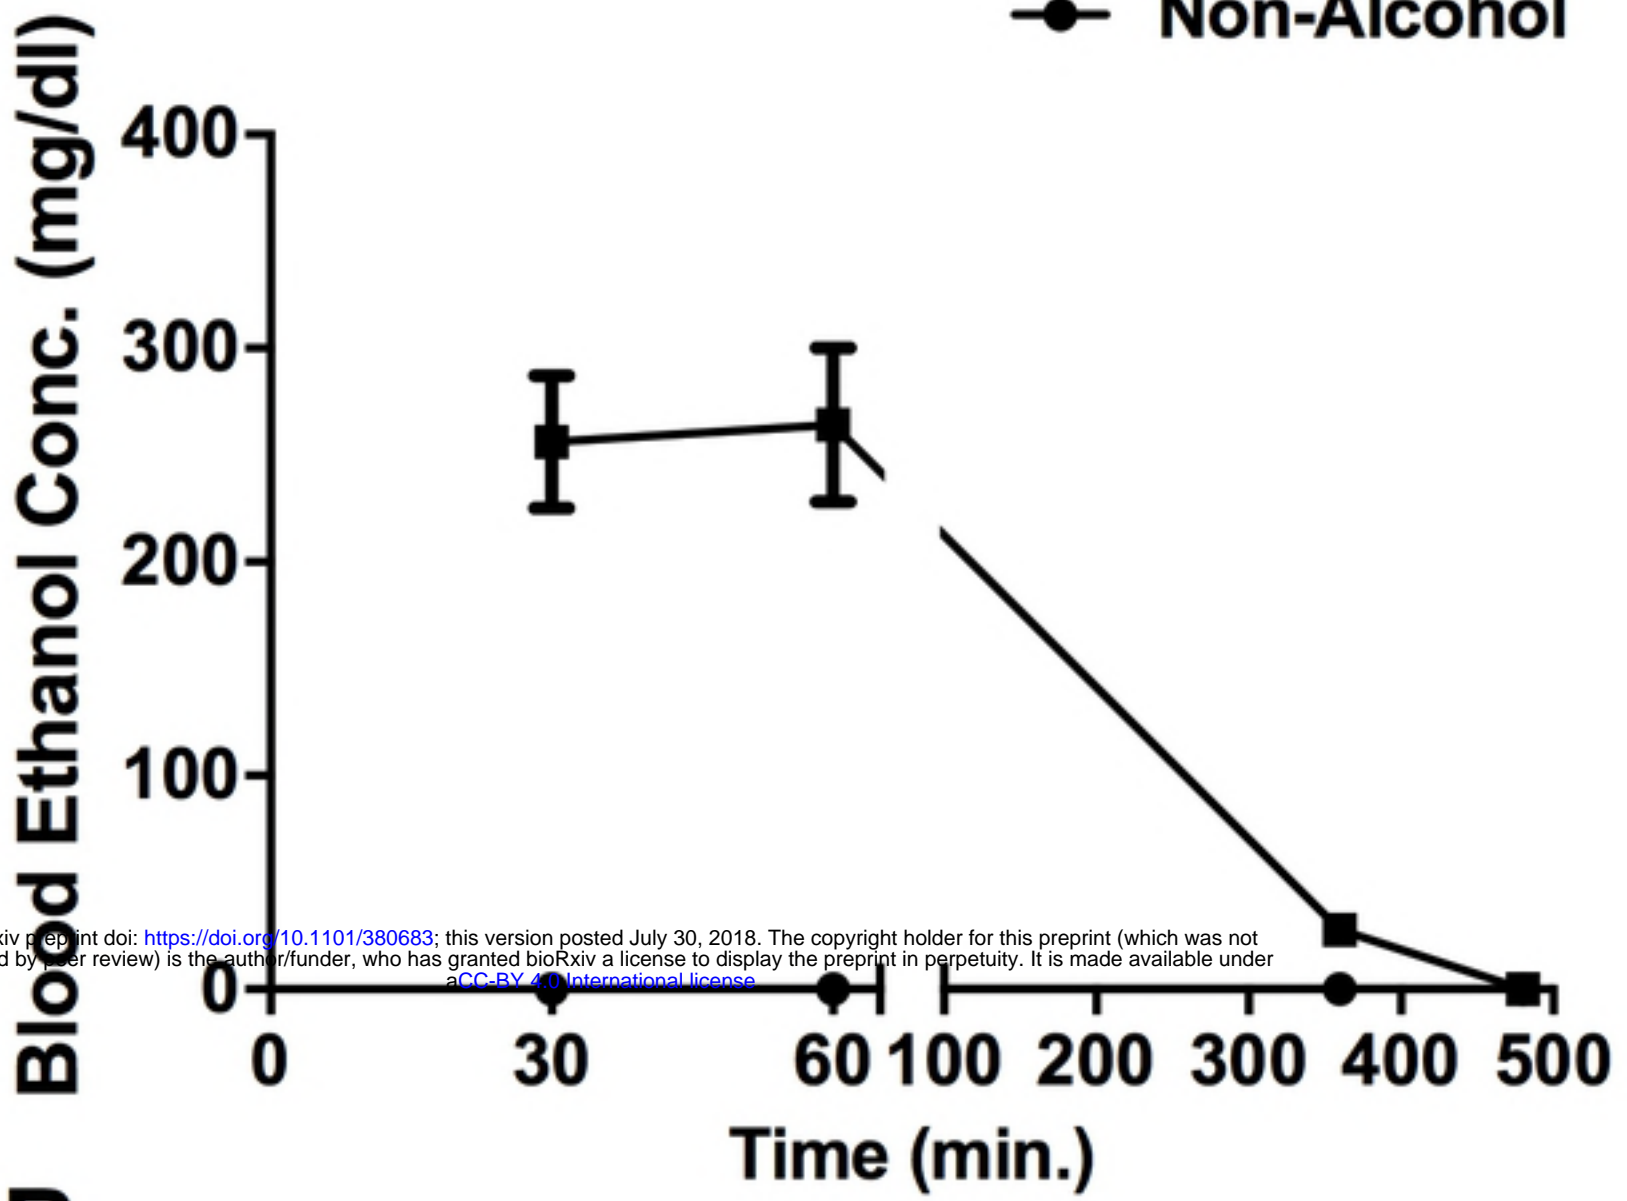**B.**

Whole Blood (CFU/mL)

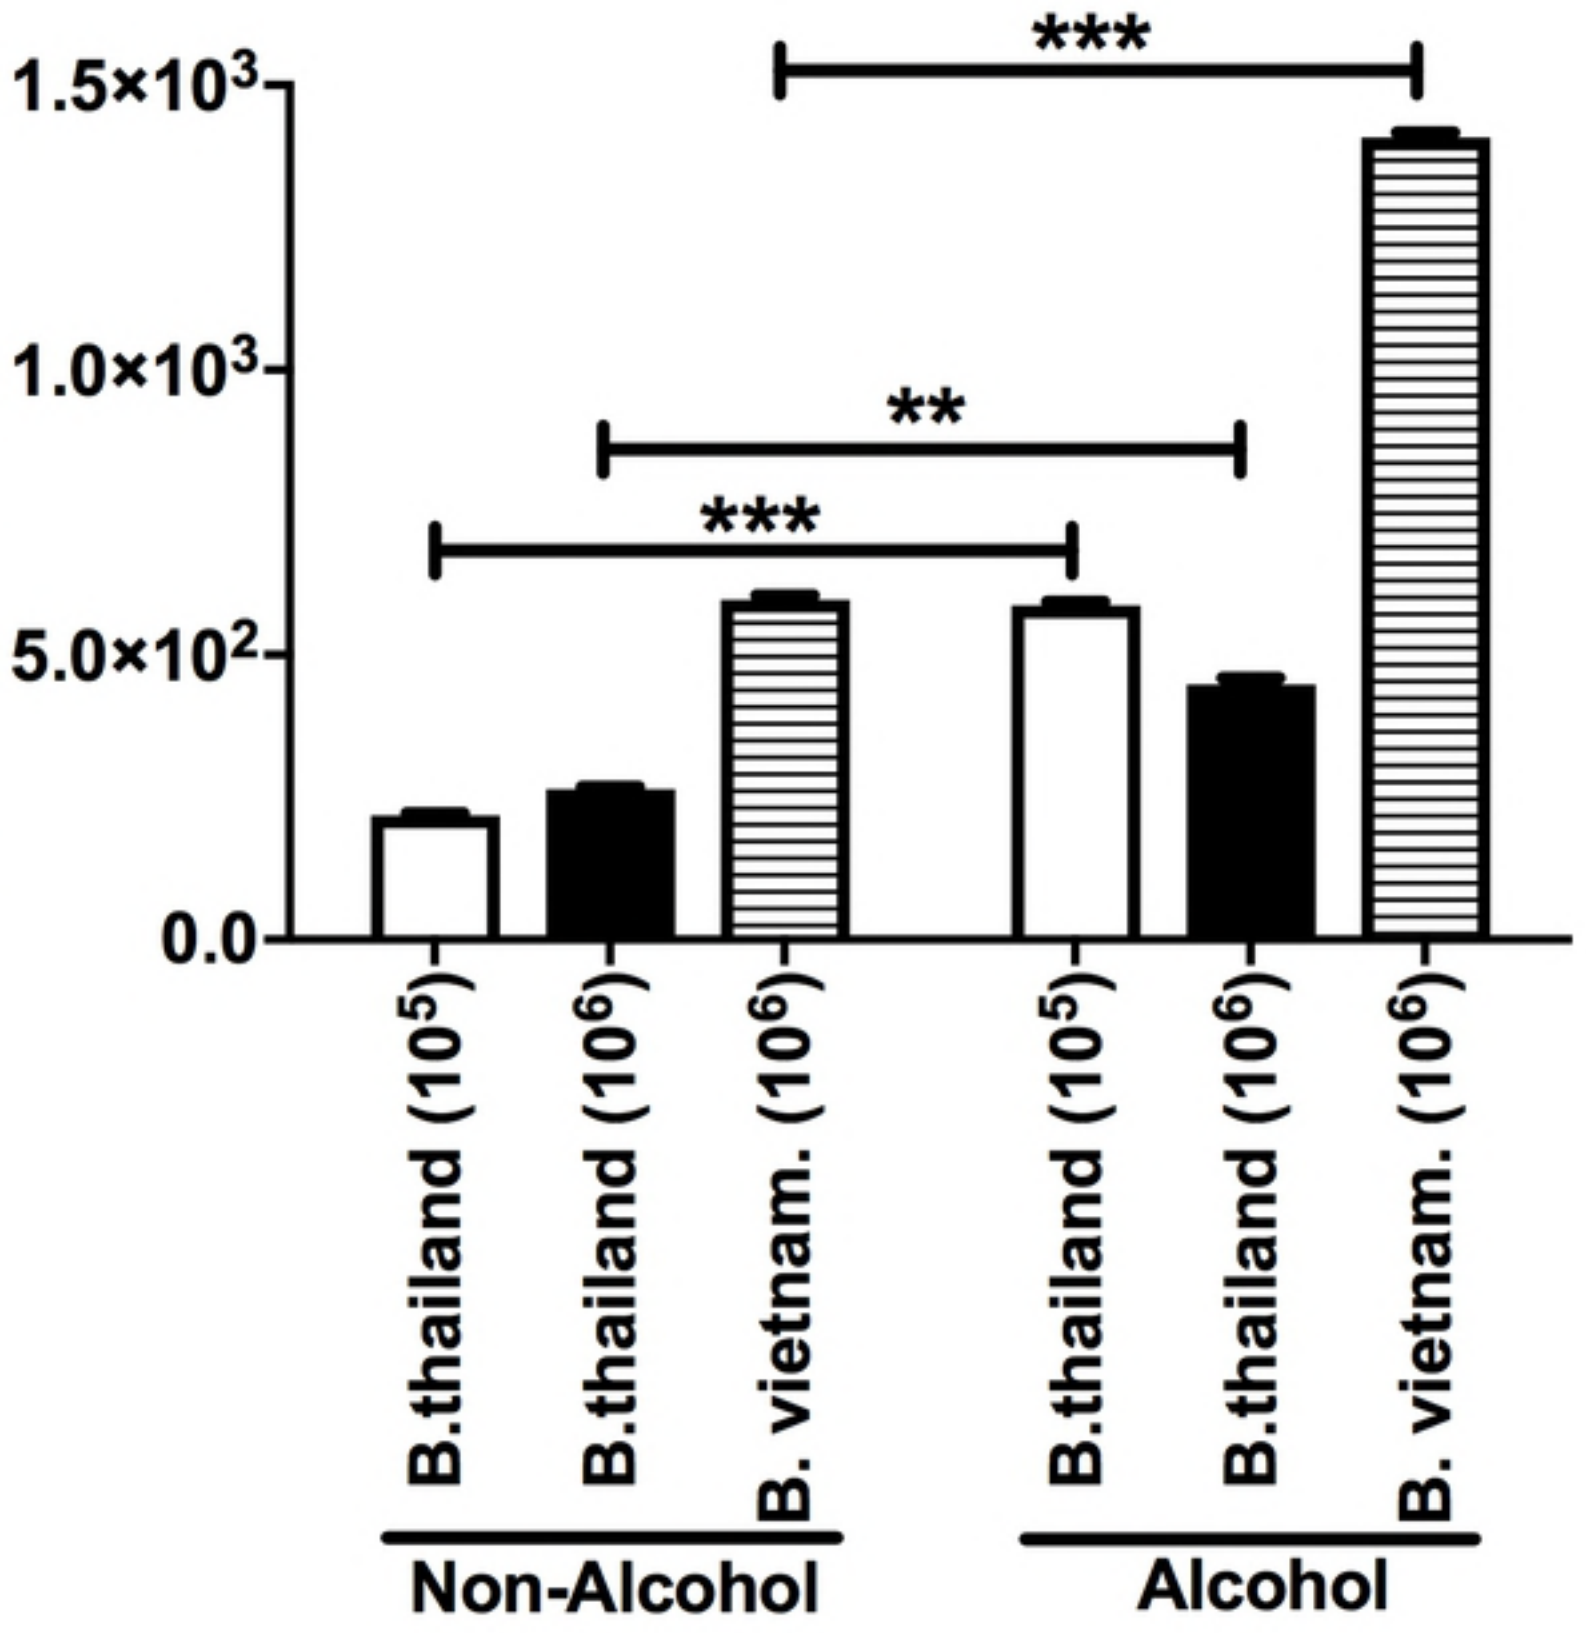

24hrs

A.

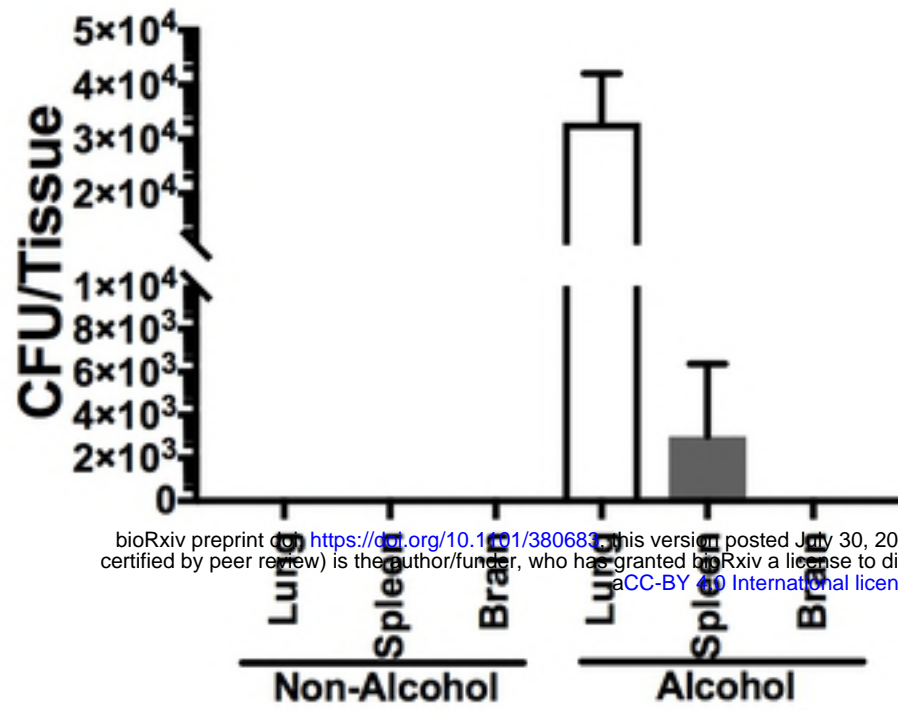

bioRxiv preprint doi: <https://doi.org/10.1101/380683>; this version posted July 30, 2018. The copyright holder for this preprint (which was not certified by peer review) is the author/funder, who has granted bioRxiv a license to display the preprint in perpetuity. It is made available under aCC-BY 4.0 International license.

72hrs

B.

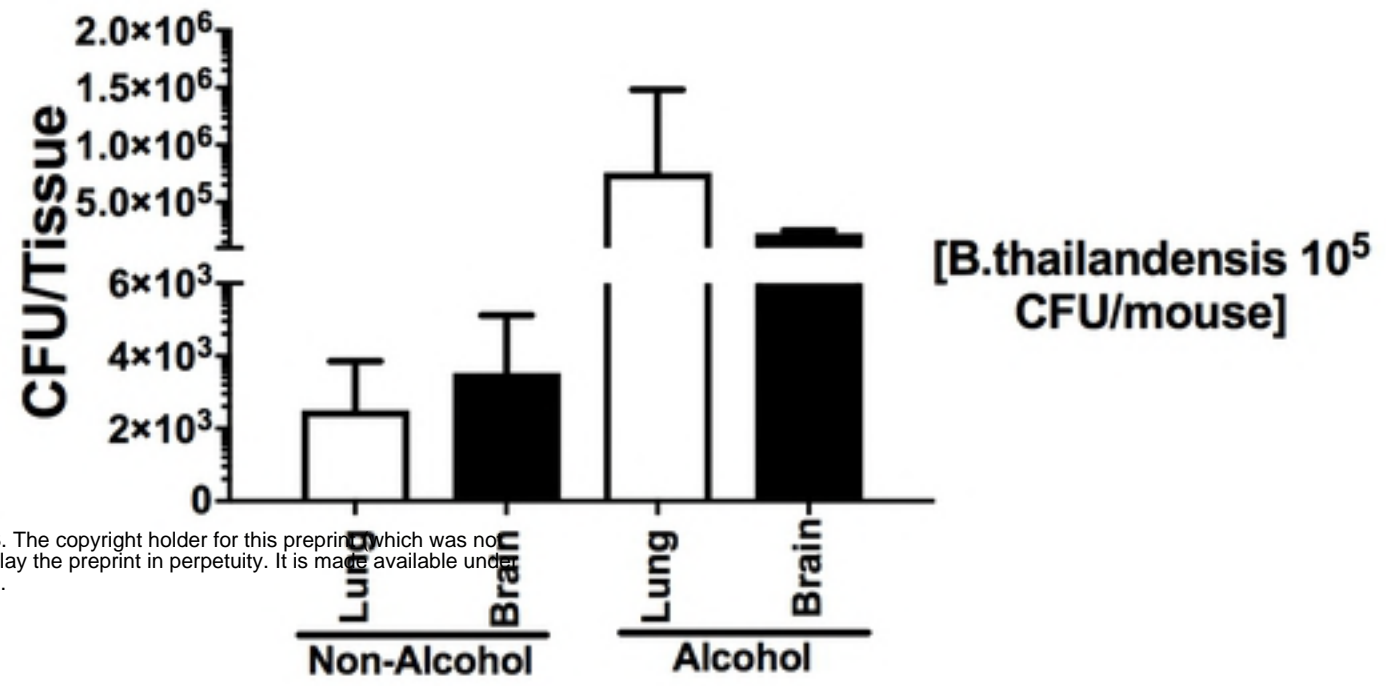

[*B.thailandensis* 10<sup>5</sup> CFU/mouse]

C.

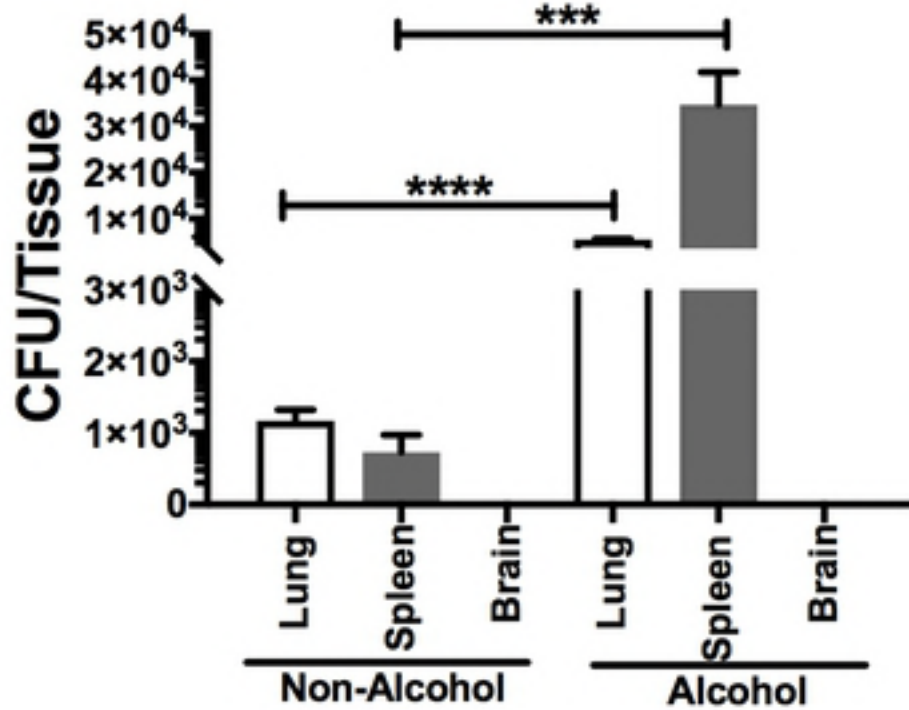

D.

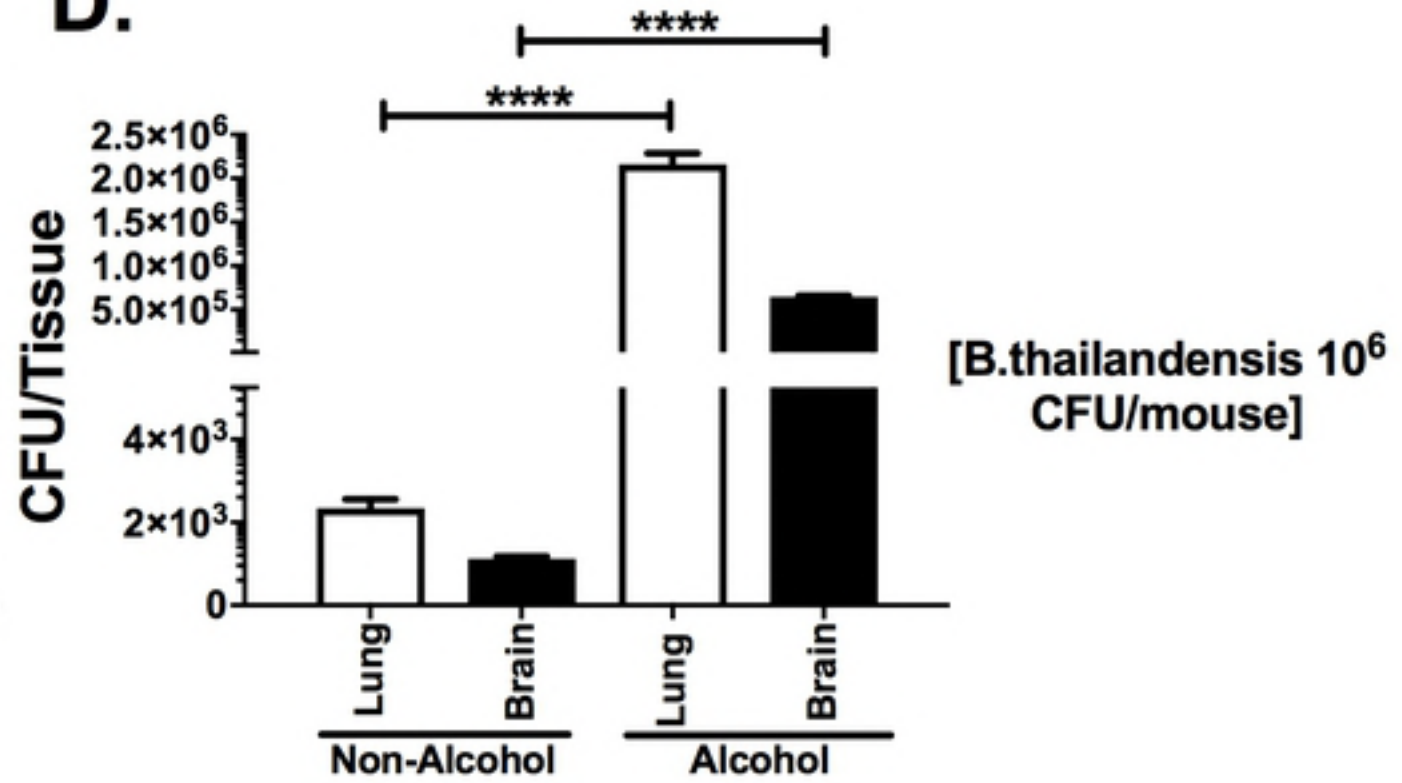

[*B.thailandensis* 10<sup>6</sup> CFU/mouse]

E.

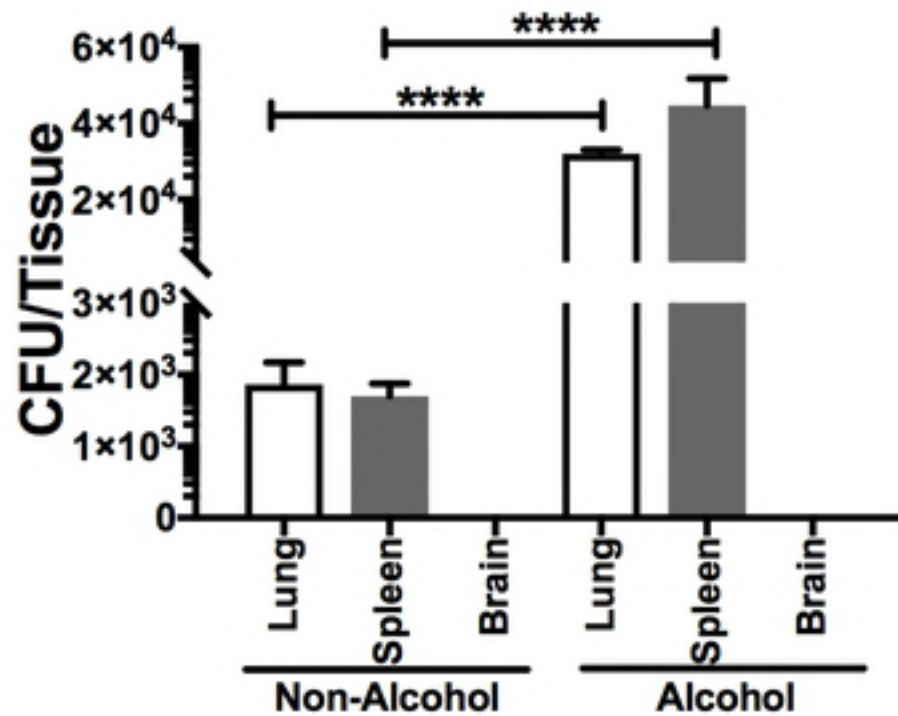

F.

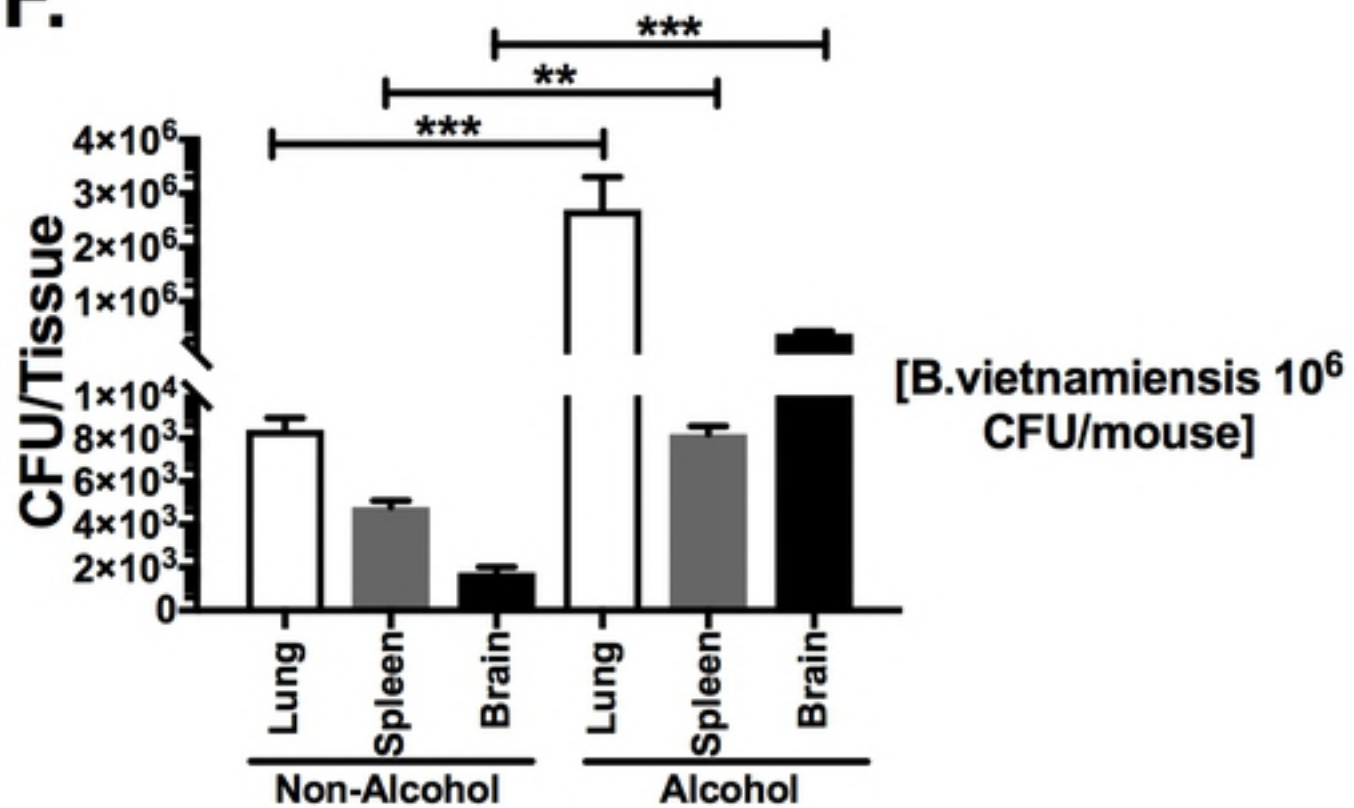

[*B.vietnamiensis* 10<sup>6</sup> CFU/mouse]



# Lung

## A.

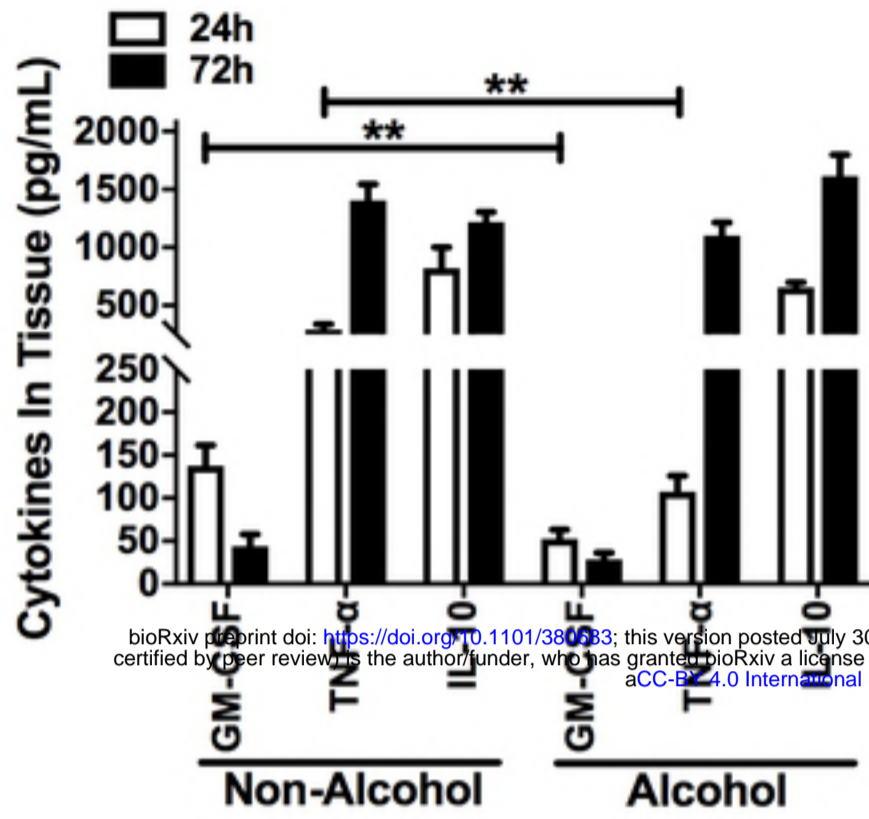

# Spleen

## B.

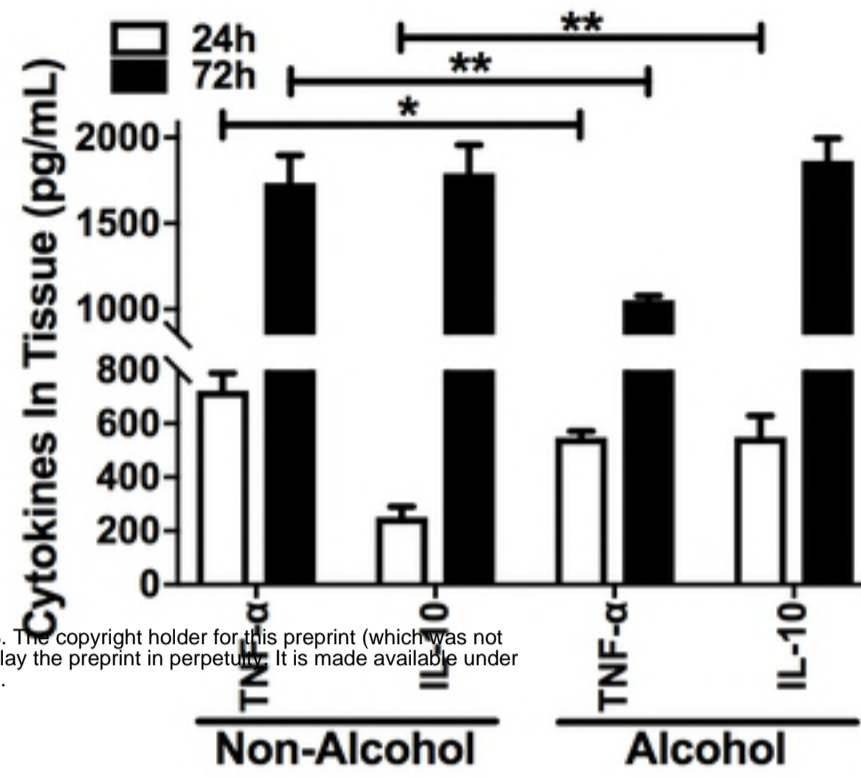

[*B.thailandensis* 10<sup>5</sup> CFU/mouse]

bioRxiv preprint doi: <https://doi.org/10.1101/380583>; this version posted July 30, 2018. The copyright holder for this preprint (which was not certified by peer review) is the author/funder, who has granted bioRxiv a license to display the preprint in perpetuity. It is made available under aCC-BY 4.0 International license.

## C.

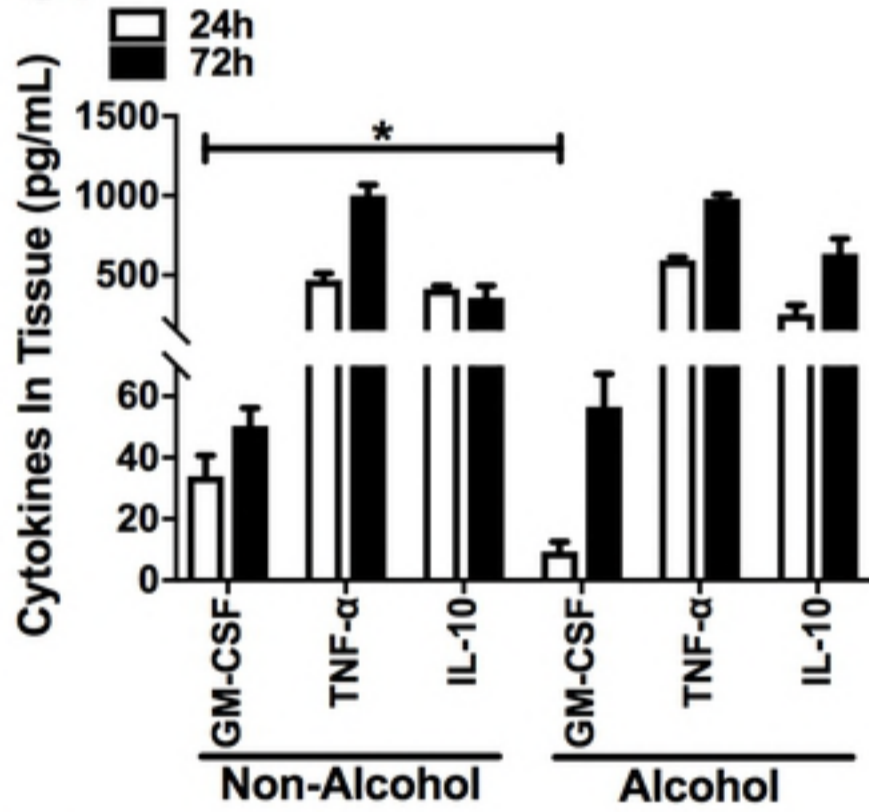

## D.

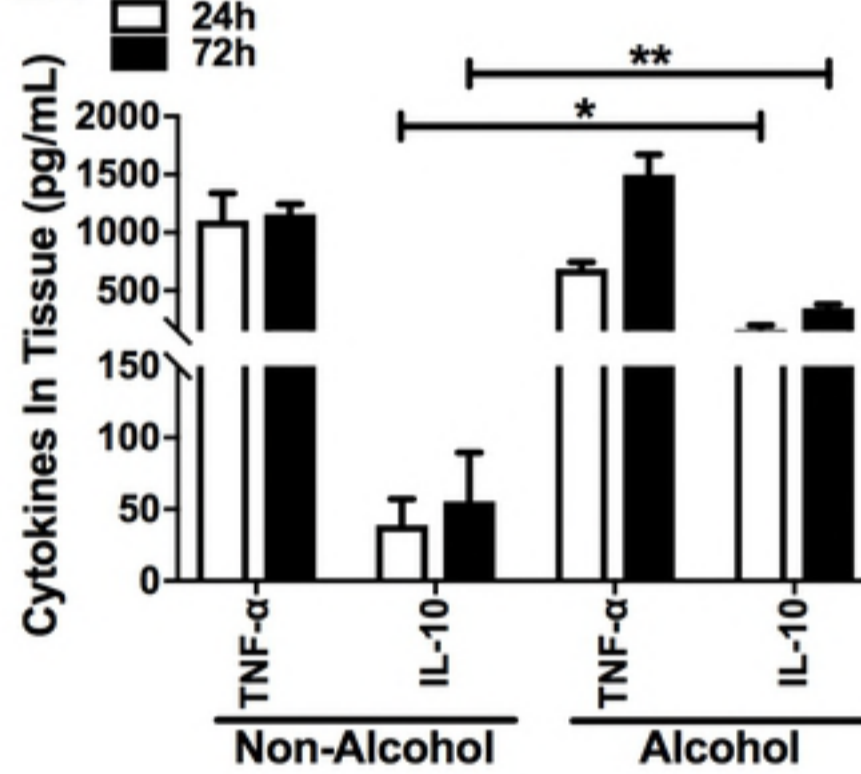

[*B.thailandensis* 10<sup>6</sup> CFU/mouse]

## E.

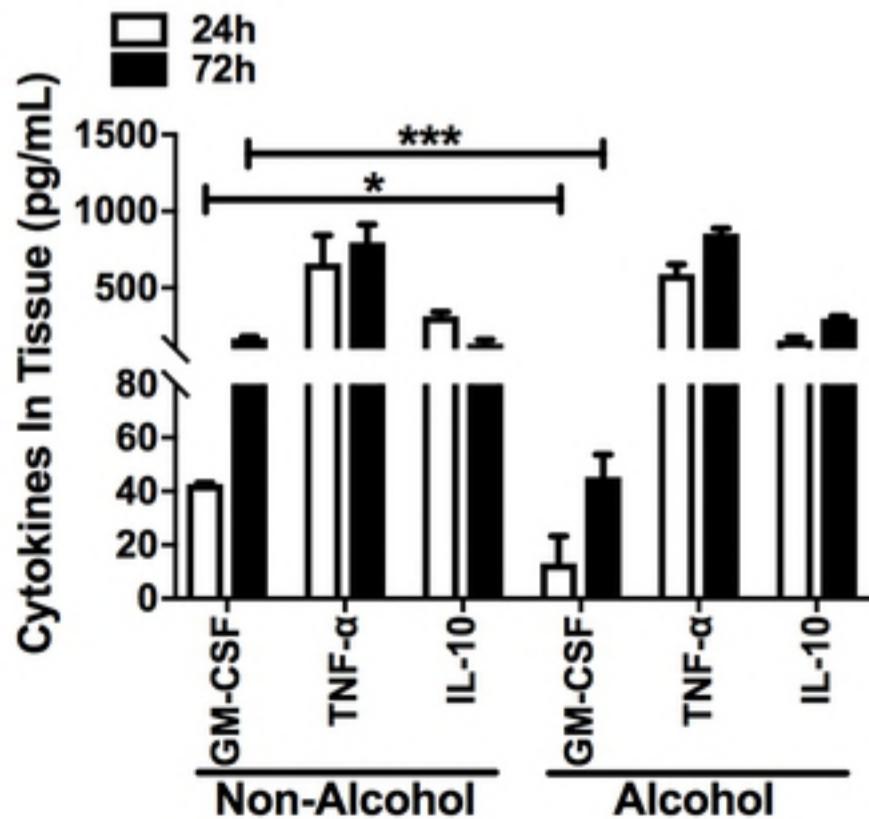

## F.

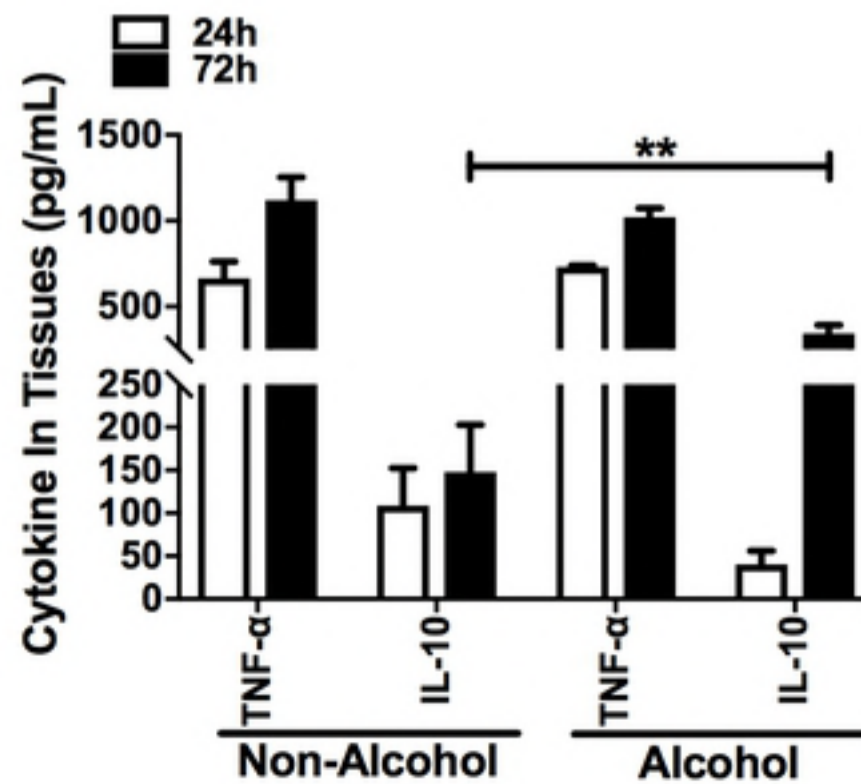

[*B.vietnamiensis* 10<sup>6</sup> CFU/mouse]

**A.****Lung Tissue**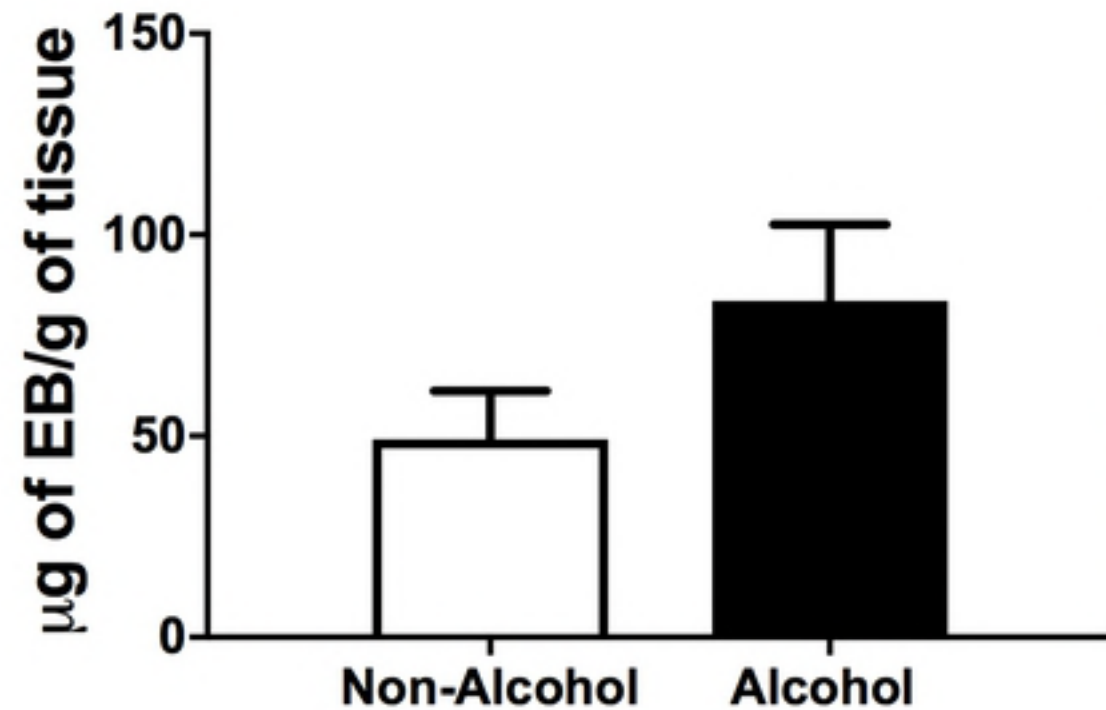**B.****Brain Tissue**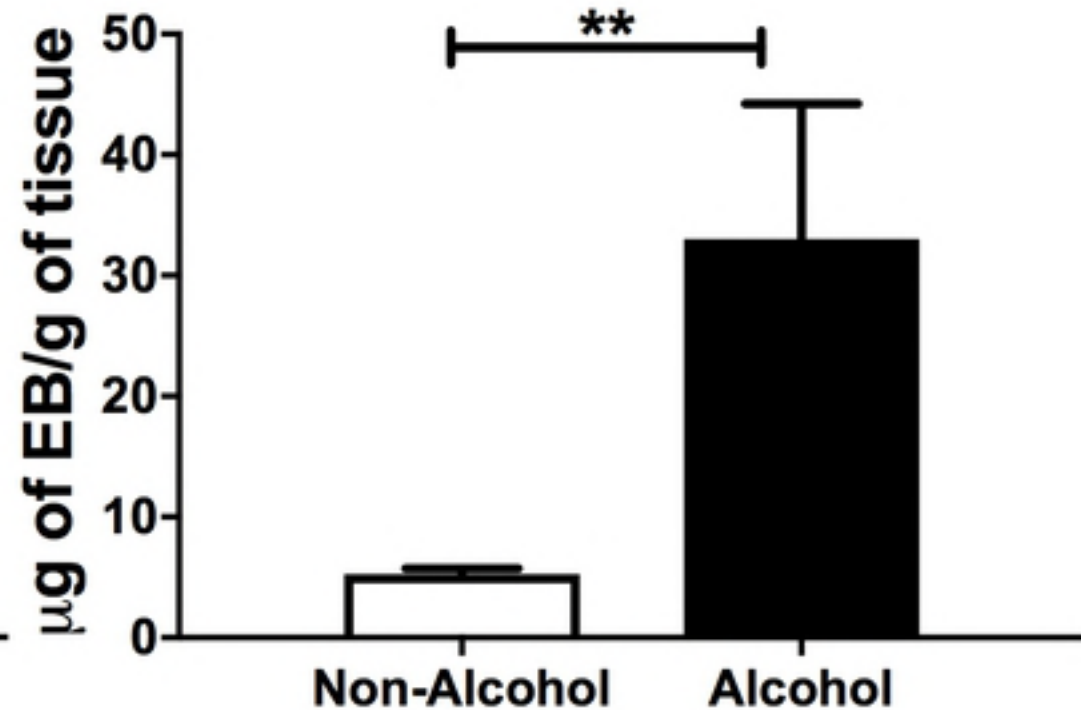

## Lung Epithelial Cells

## Brain Endothelial Cells

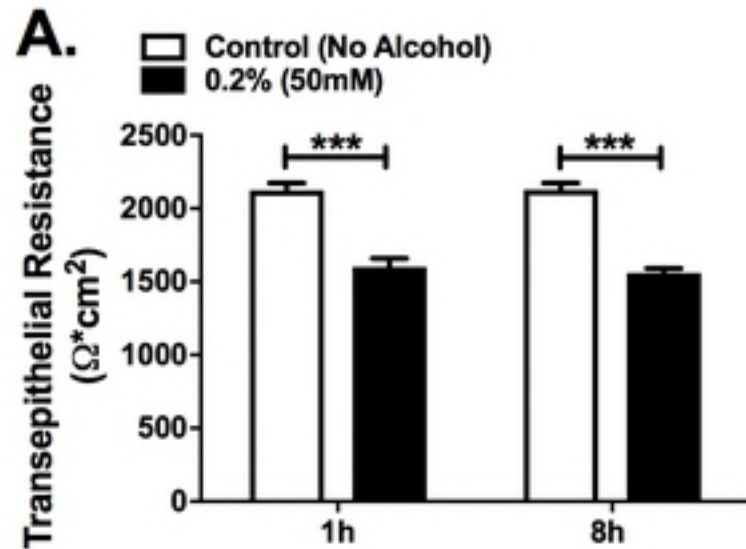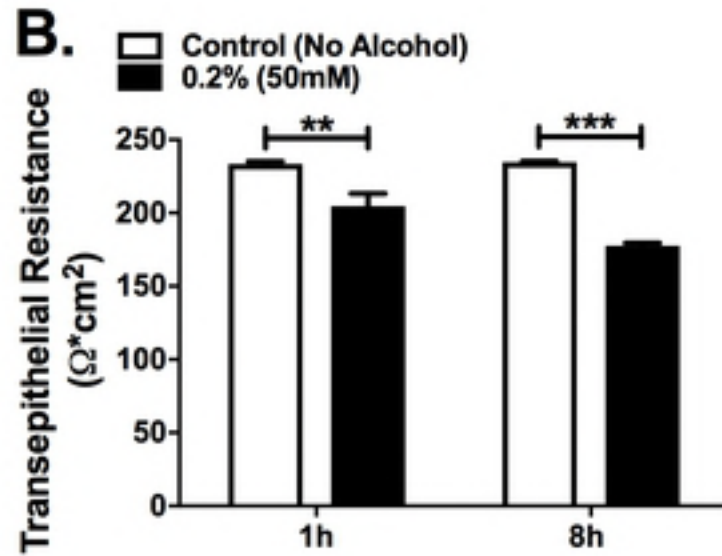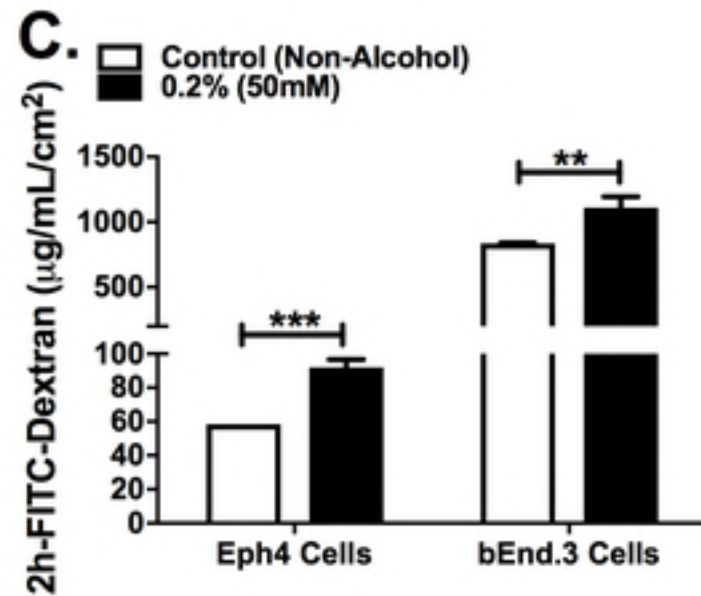

## Lung Epithelial Cells

**A.**

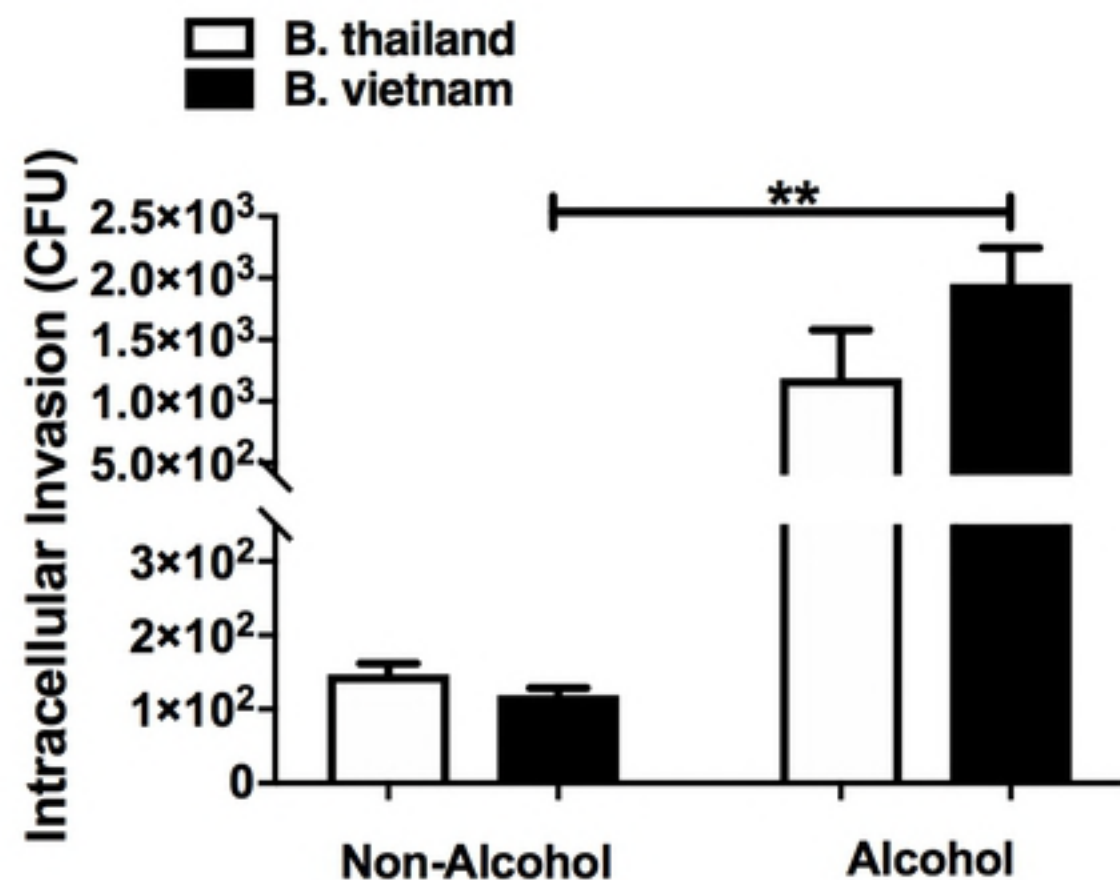

## Brain Endothelial Cells

**B.**

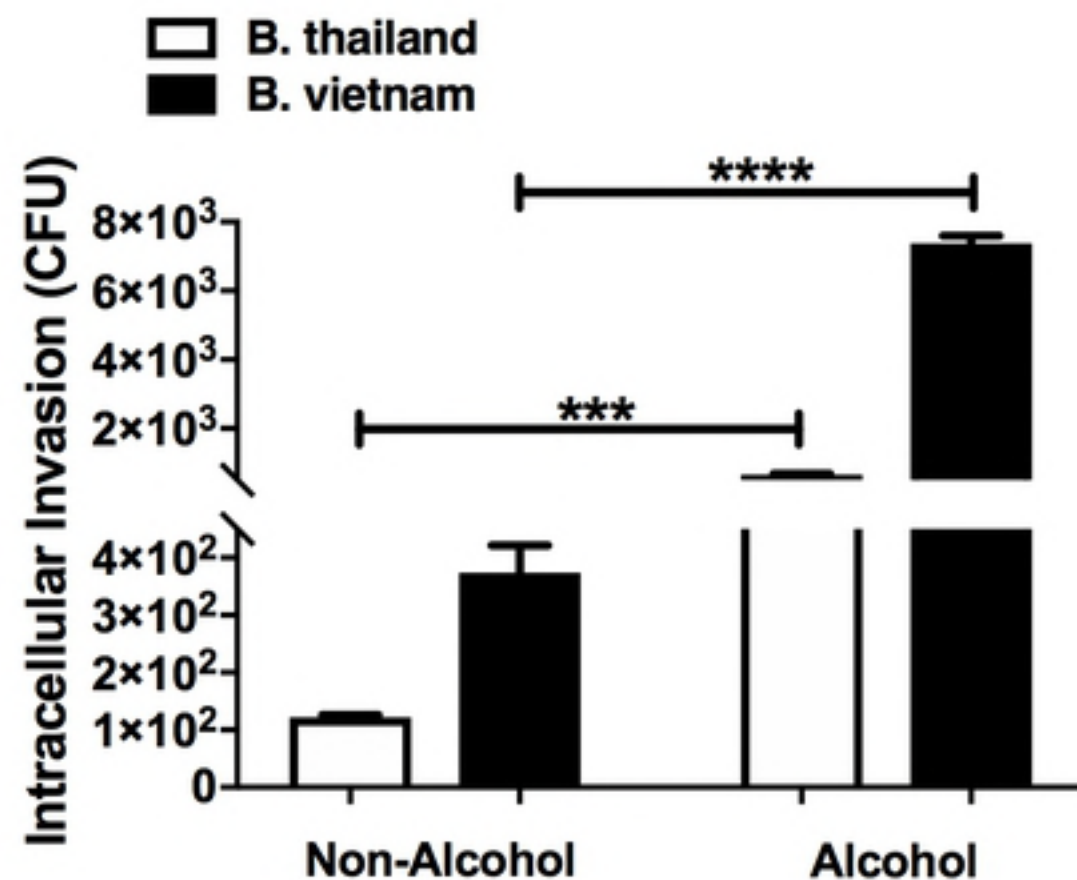

Source: https://www.biorxiv.org/content/10.1101/380683v1.full.pdf
